# Supplementary material
Source: publisher figshare collection journal article supplement (https://acs.figshare.com/ndownloader/files/4539058)

**Supporting Information Available**

**Isocoumarin Glucosides from the Scale Insect Fungus *Torrubiella tenuis***

**BCC 12732**

*Jittra Kornsakulkarn, Chawanee Thongpanchang,\* Sanisa Lapanun, and Kitlada*

*Srichomthong*

National Center for Genetic Engineering and Biotechnology (BIOTEC), Thailand

Science Park, 113 Phaholyothin Road, Klong Luang, Pathumthani 12120 Thailand

\* Corresponding author. Tel: +66 2 5646700 ext. 3559. Fax: +66 2 5646707. E-mail: chawanee@biotec.or.th

## Contents

|     |                                                                            |
|-----|----------------------------------------------------------------------------|
| S1  | $^1\text{H}$ NMR of Compound <b>1</b> in DMSO $\text{d}_6$                 |
| S2  | $^1\text{H}$ NMR of Compound <b>1</b> in DMSO $\text{d}_6$                 |
| S3  | $^1\text{H}$ NMR of Compound <b>1</b> in DMSO $\text{d}_6$                 |
| S4  | $^{13}\text{C}$ NMR of Compound <b>1</b> in DMSO $\text{d}_6$              |
| S5  | $^{13}\text{C}$ NMR and DEPT-135 of Compound <b>1</b> in DMSO $\text{d}_6$ |
| S6  | HMQC of Compound <b>1</b> in DMSO $\text{d}_6$                             |
| S7  | HMBC of Compound <b>1</b> in DMSO $\text{d}_6$                             |
| S8  | HMBC of Compound <b>1</b> in DMSO $\text{d}_6$                             |
| S9  | HMBC of Compound <b>1</b> in DMSO $\text{d}_6$                             |
| S10 | HMBC of Compound <b>1</b> in DMSO $\text{d}_6$                             |
| S11 | NOESY of Compound <b>1</b> in DMSO $\text{d}_6$                            |
| S12 | NOESY of Compound <b>1</b> in DMSO $\text{d}_6$                            |
| S13 | $^1\text{H}$ NMR of Compound <b>3</b> in DMSO $\text{d}_6$                 |
| S14 | $^1\text{H}$ NMR of Compound <b>3</b> in DMSO $\text{d}_6$                 |
| S15 | $^1\text{H}$ NMR of Compound <b>3</b> in DMSO $\text{d}_6$                 |
| S16 | $^{13}\text{C}$ NMR of Compound <b>3</b> in DMSO $\text{d}_6$              |
| S17 | $^{13}\text{C}$ NMR and DEPT-135 of Compound <b>3</b> in DMSO $\text{d}_6$ |
| S18 | HMQC of Compound <b>3</b> in DMSO $\text{d}_6$                             |
| S19 | HMBC of Compound <b>3</b> in DMSO $\text{d}_6$                             |
| S20 | HMBC of Compound <b>3</b> in DMSO $\text{d}_6$                             |
| S21 | HMBC of Compound <b>3</b> in DMSO $\text{d}_6$                             |
| S22 | HMBC of Compound <b>3</b> in DMSO $\text{d}_6$                             |

- S23 NOESY of Compound **3** in DMSO d<sub>6</sub>
- S24 NOESY of Compound **3** in DMSO d<sub>6</sub>
- S25 <sup>1</sup>H NMR of Compound **4** in DMSO d<sub>6</sub>
- S26 <sup>1</sup>H NMR of Compound **4** in DMSO d<sub>6</sub>
- S27 <sup>13</sup>C NMR of Compound **4** in DMSO d<sub>6</sub>
- S28 <sup>13</sup>C NMR and DEPT-135 of Compound **4** in DMSO d<sub>6</sub>
- S29 HMQC of Compound **4** in DMSO d<sub>6</sub>
- S30 HMBC of Compound **4** in DMSO d<sub>6</sub>
- S31 HMBC of Compound **4** in DMSO d<sub>6</sub>
- S32 HMBC of Compound **4** in DMSO d<sub>6</sub>
- S33 NOESY of Compound **4** in DMSO d<sub>6</sub>
- S34 NOESY of Compound **4** in DMSO d<sub>6</sub>

S1  $^1\text{H}$  NMR of Compound **1** in DMSO  $\text{d}_6$

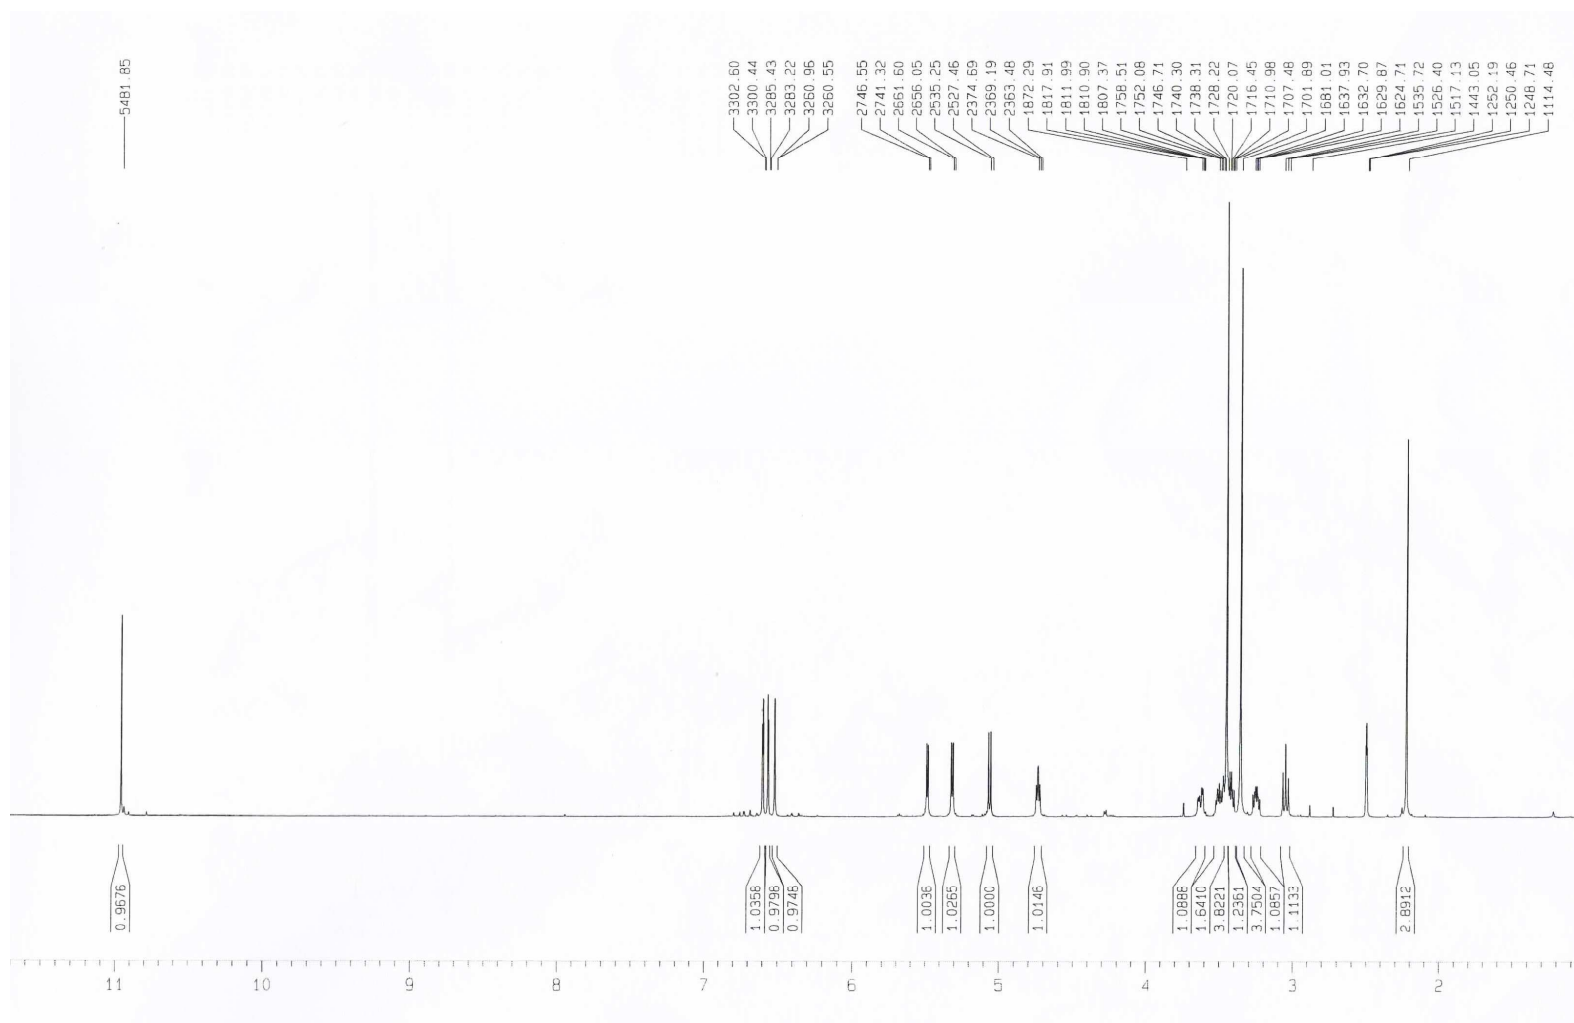

S2  $^1\text{H}$  NMR of Compound **1** in DMSO  $\text{d}_6$

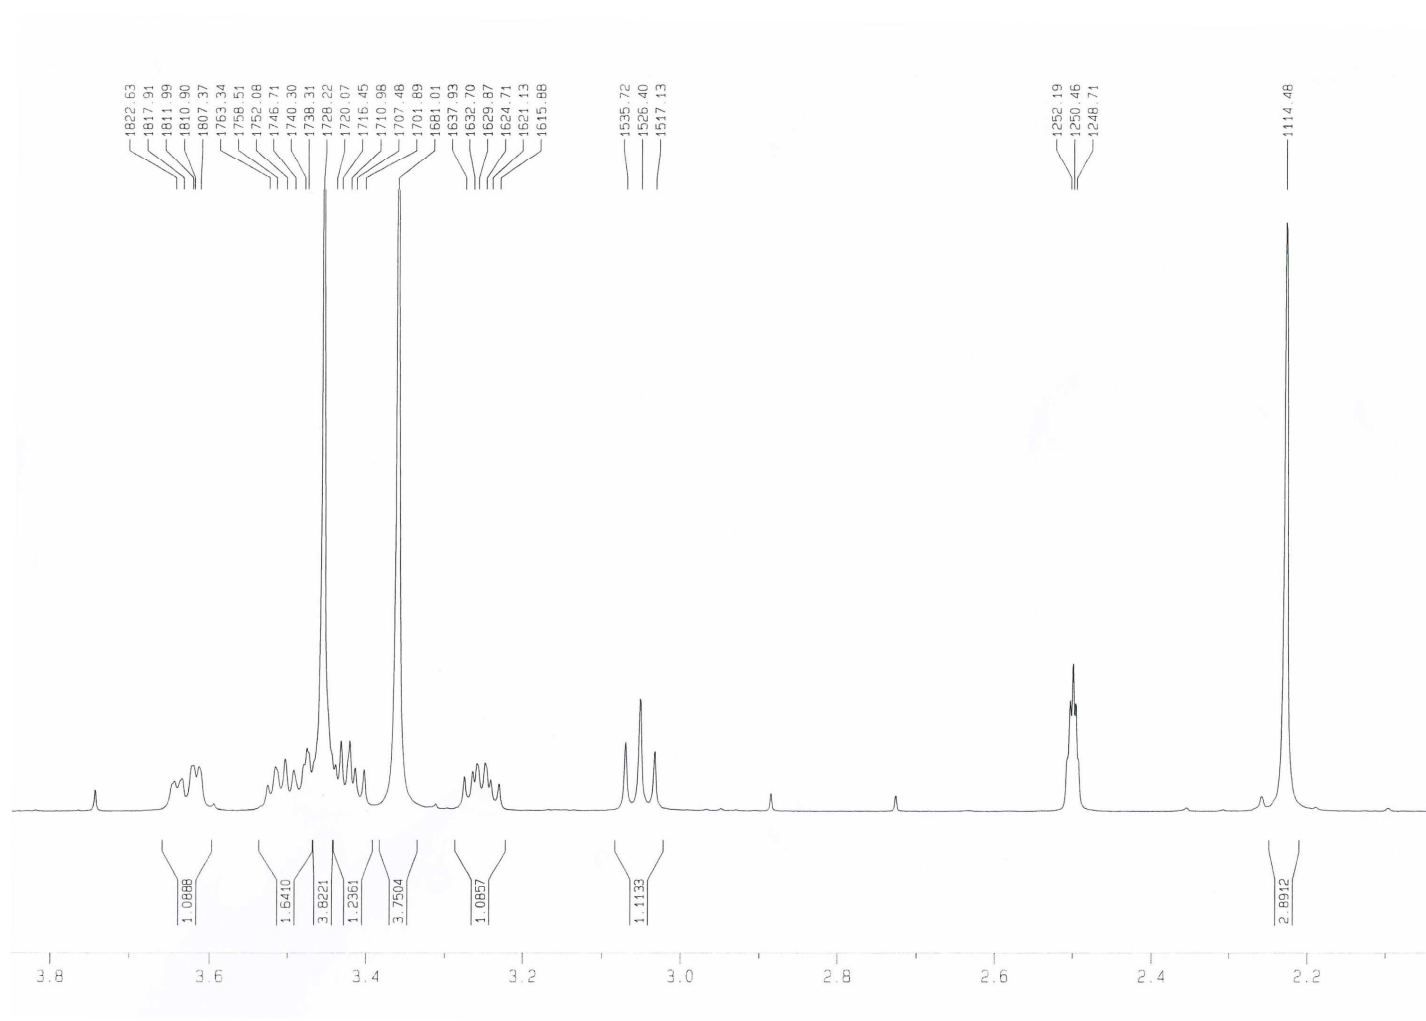

S3  $^1\text{H}$  NMR of Compound **1** in DMSO  $\text{d}_6$

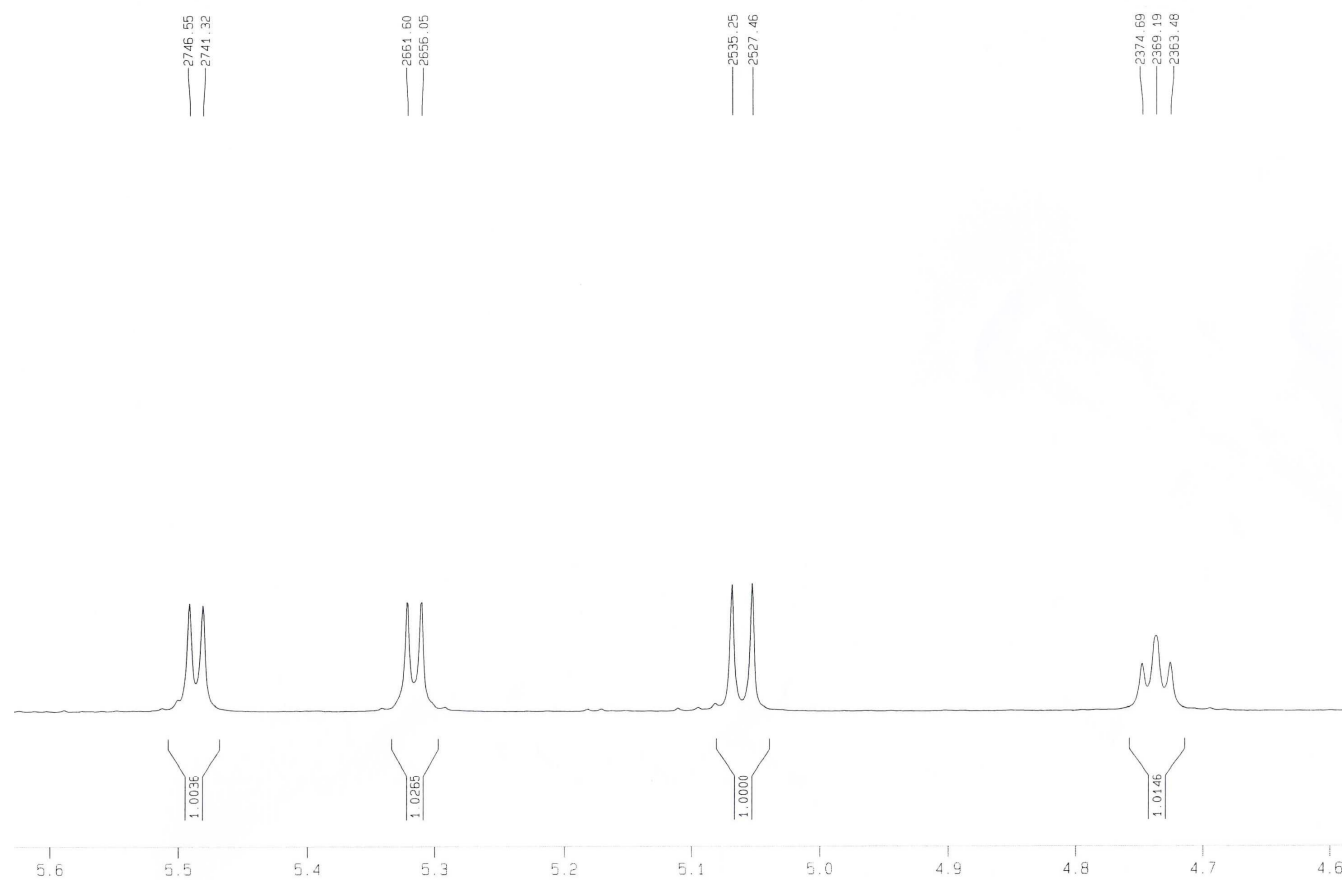

S4  $^{13}\text{C}$  NMR of Compound **1** in DMSO  $\text{d}_6$

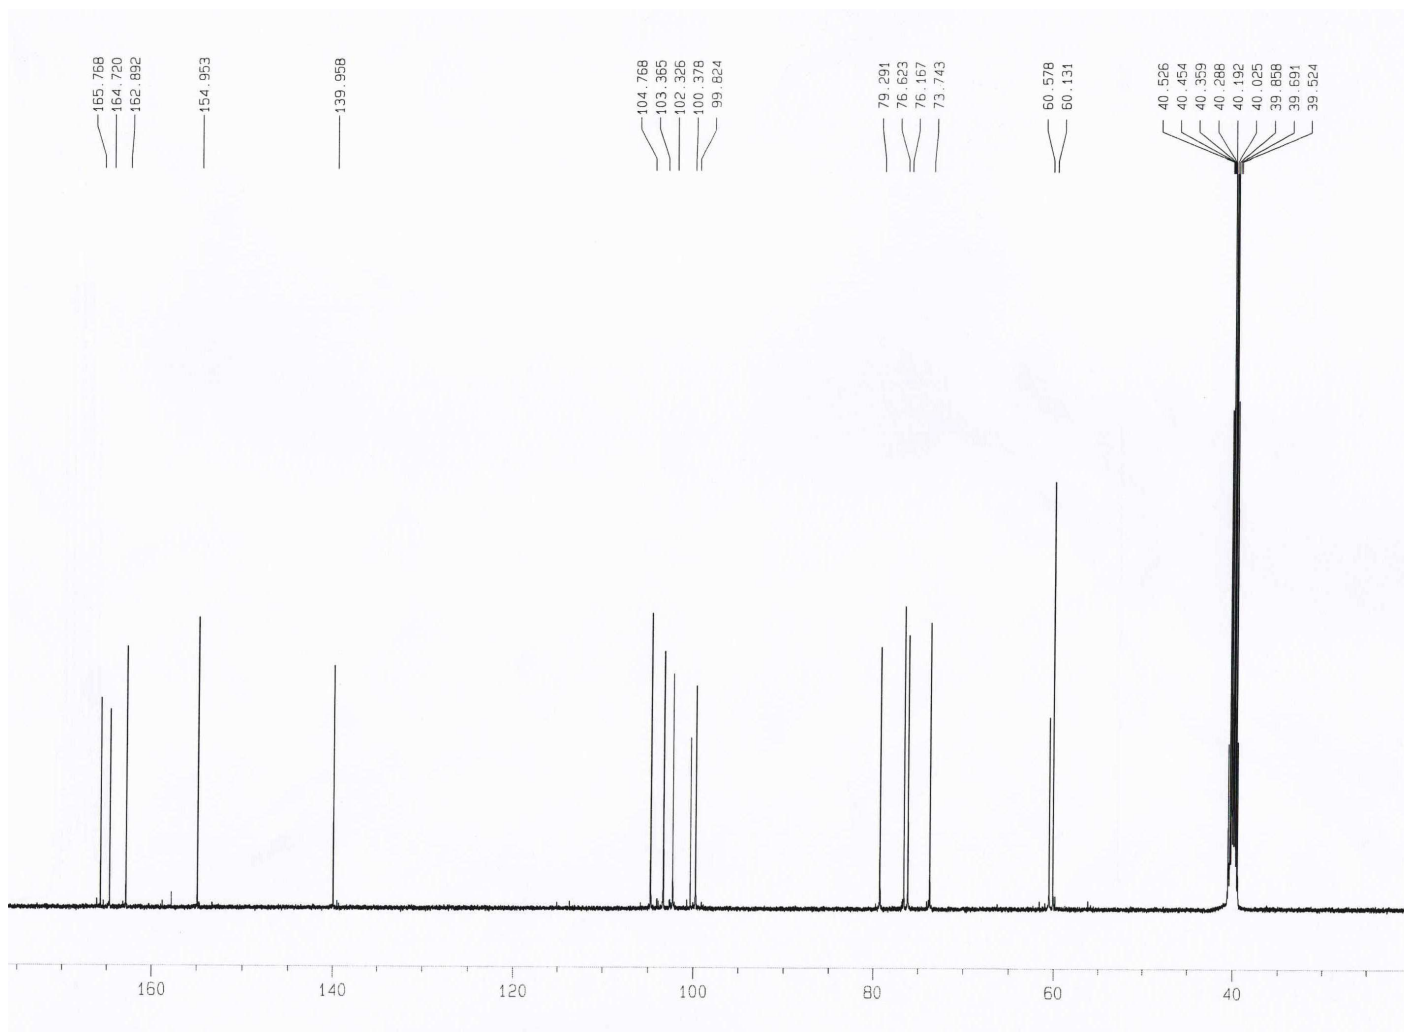

S5  $^{13}\text{C}$  NMR and DEPT-135 of Compound **1** in DMSO  $\text{d}_6$

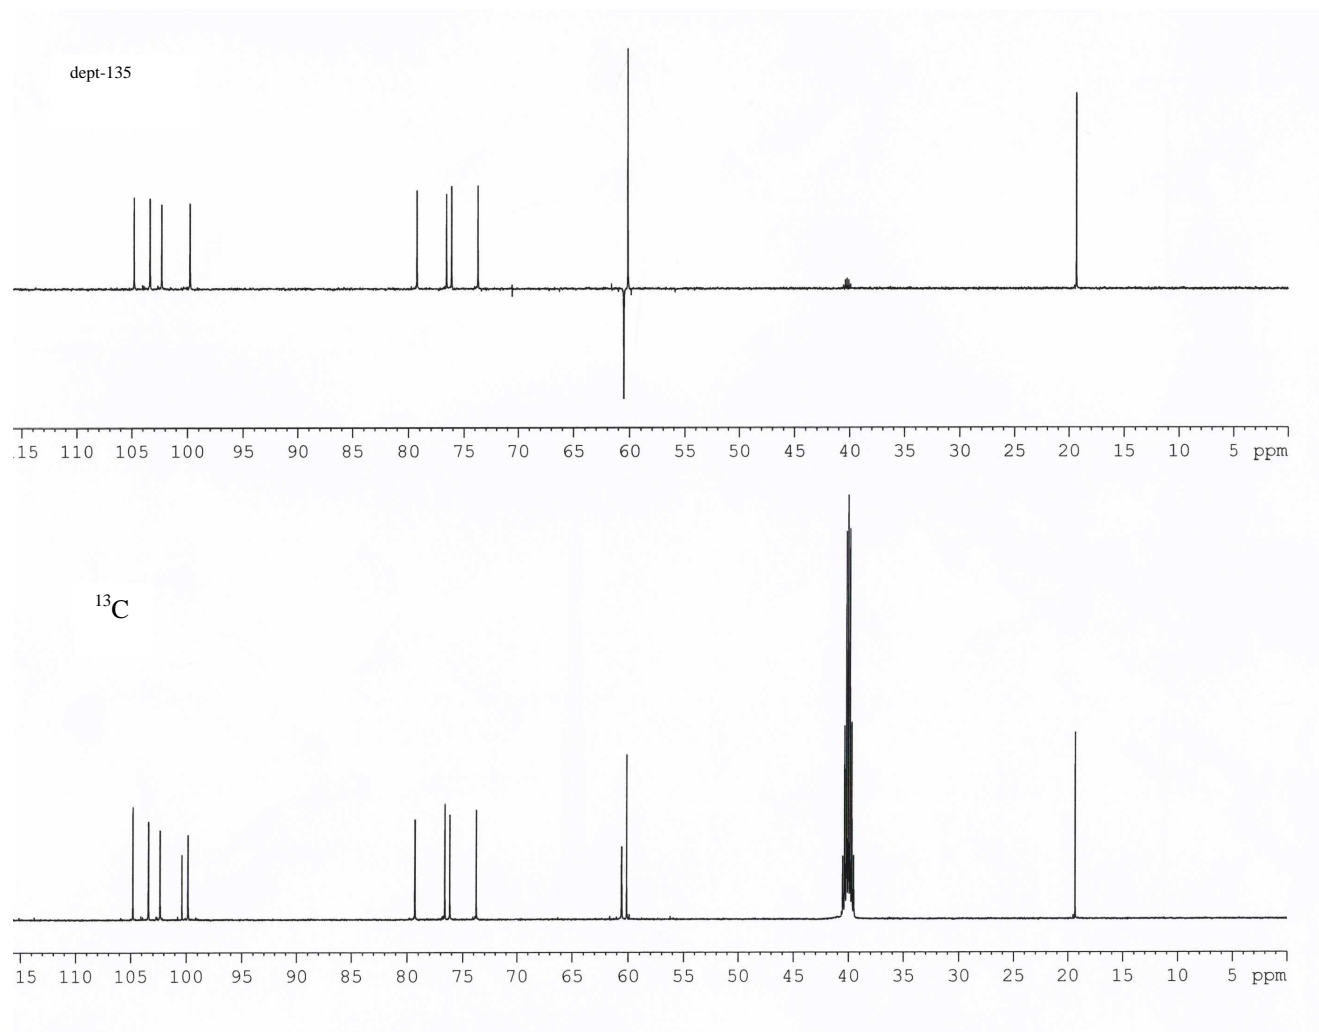



S6 HMQC of Compound **1** in DMSO d<sub>6</sub>

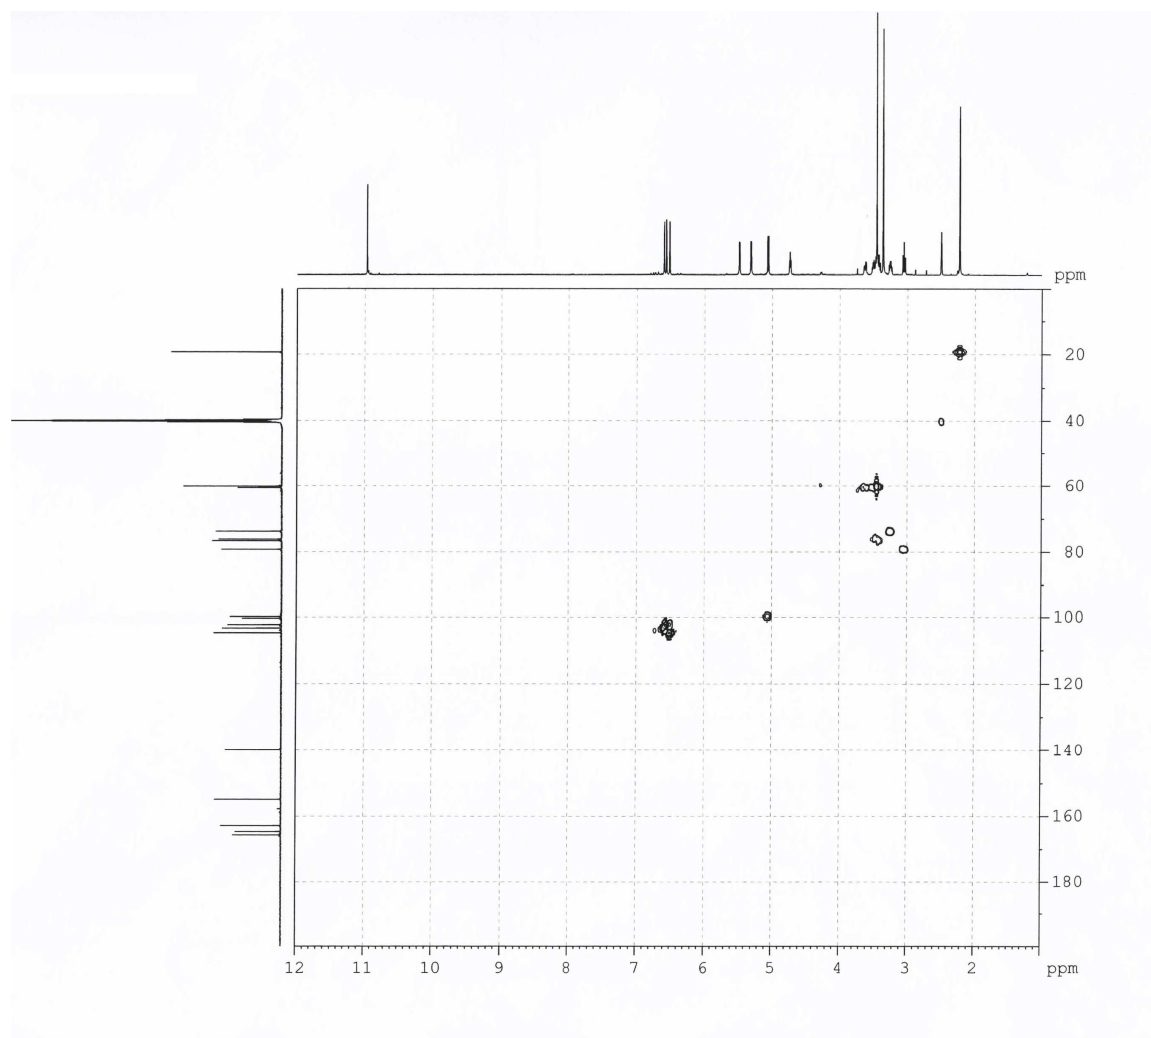

S7 HMBC of Compound **1** in DMSO d<sub>6</sub>

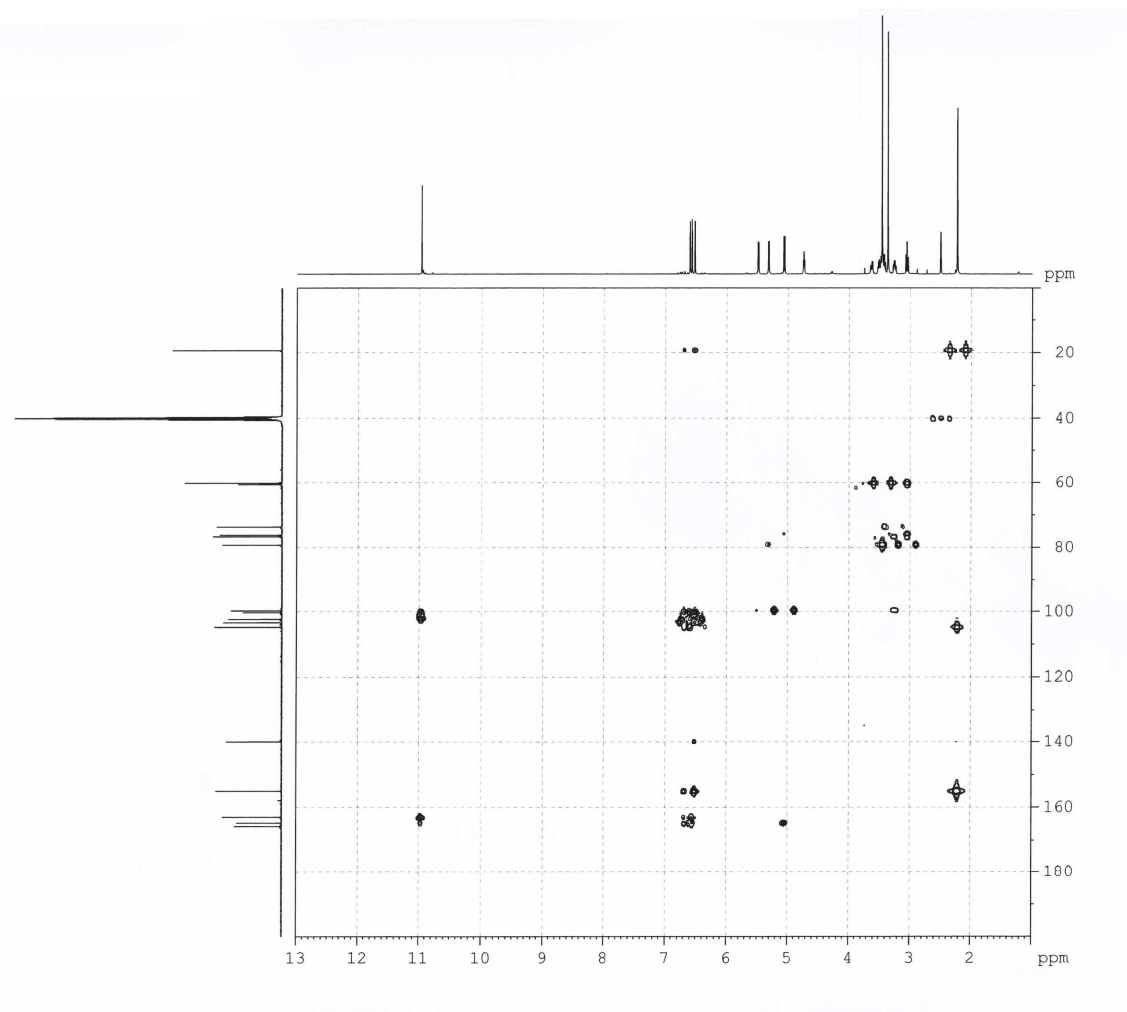

S8 HMBC of Compound **1** in DMSO d<sub>6</sub>

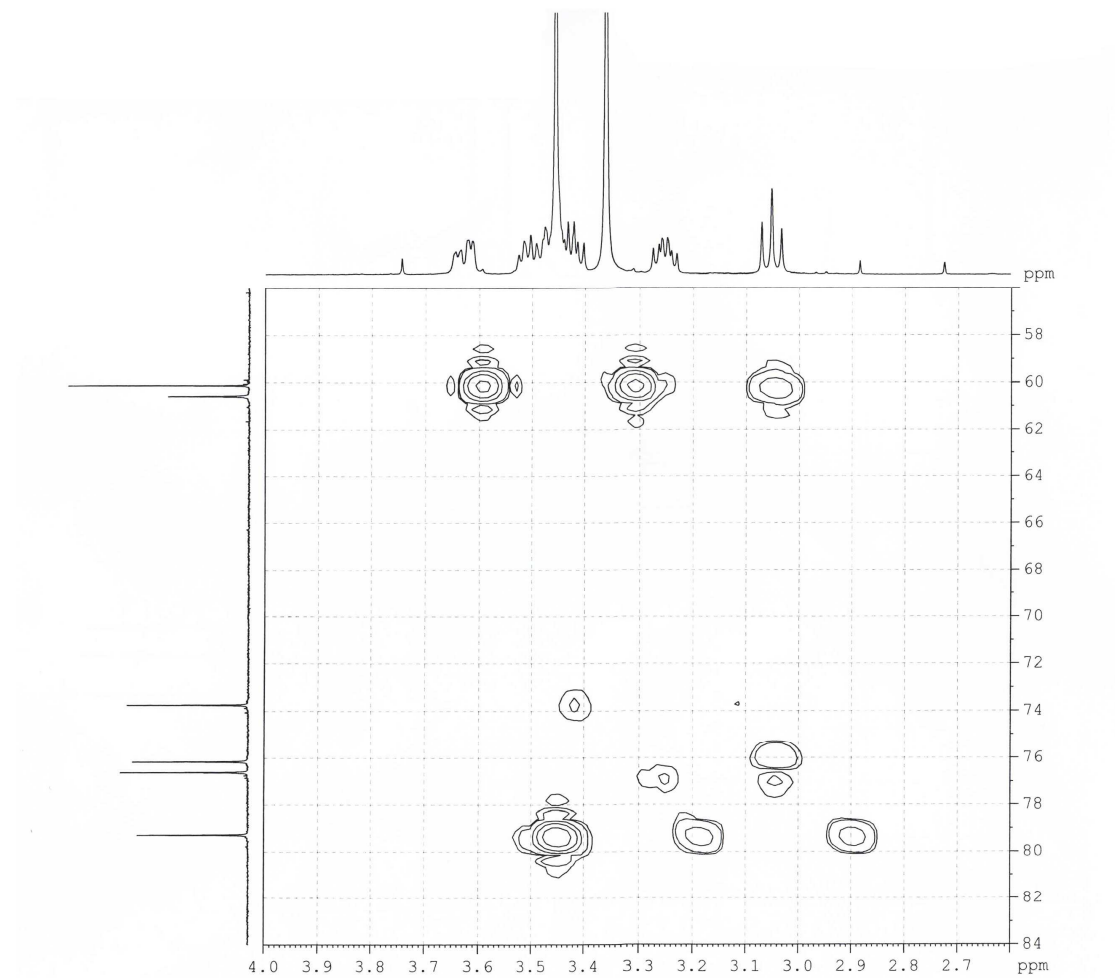

S9 HMBC of Compound **1** in DMSO d<sub>6</sub>

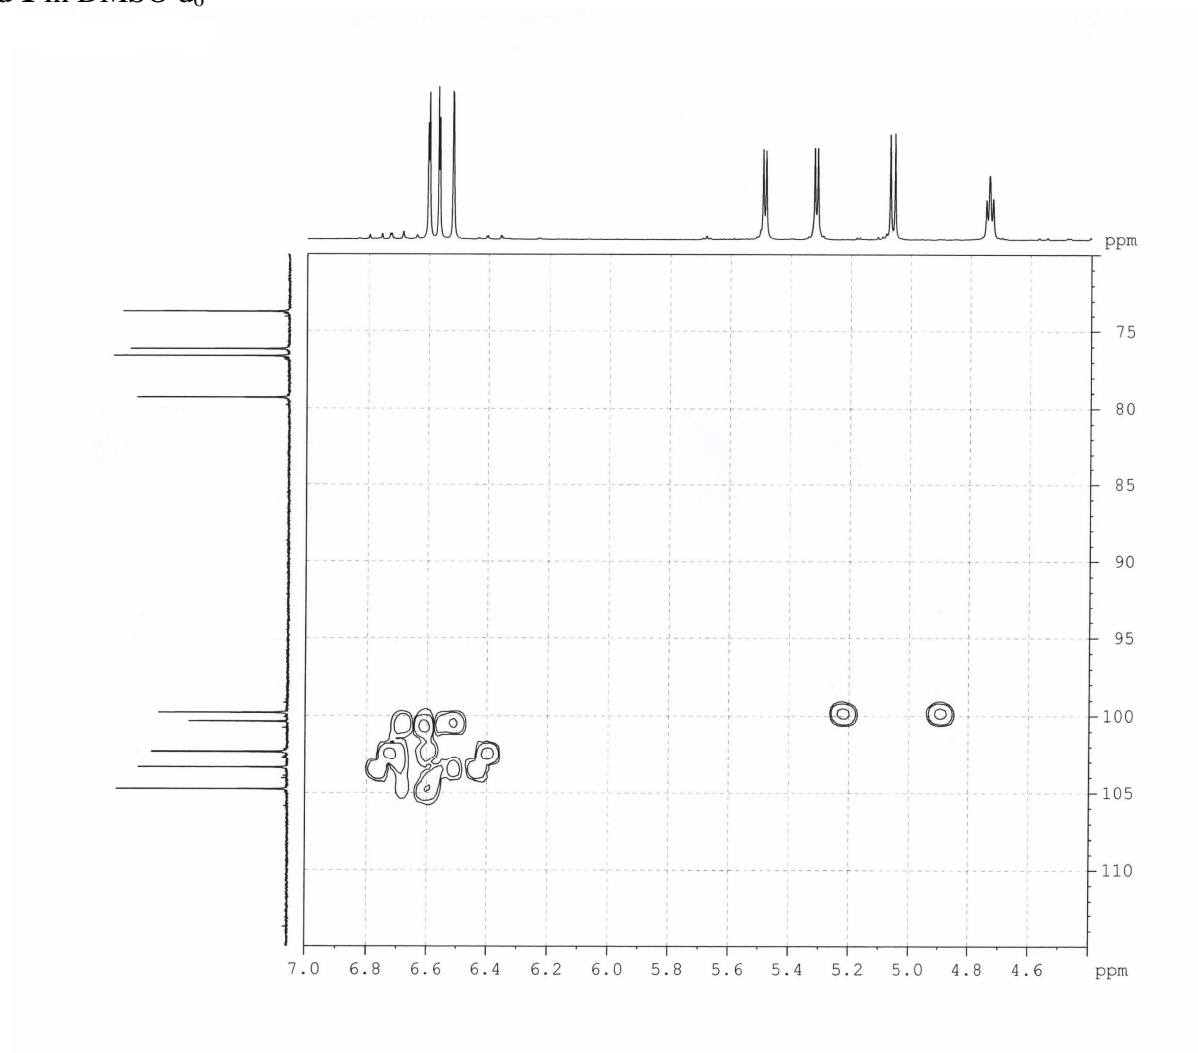

S10 HMBC of Compound **1** in DMSO  $d_6$

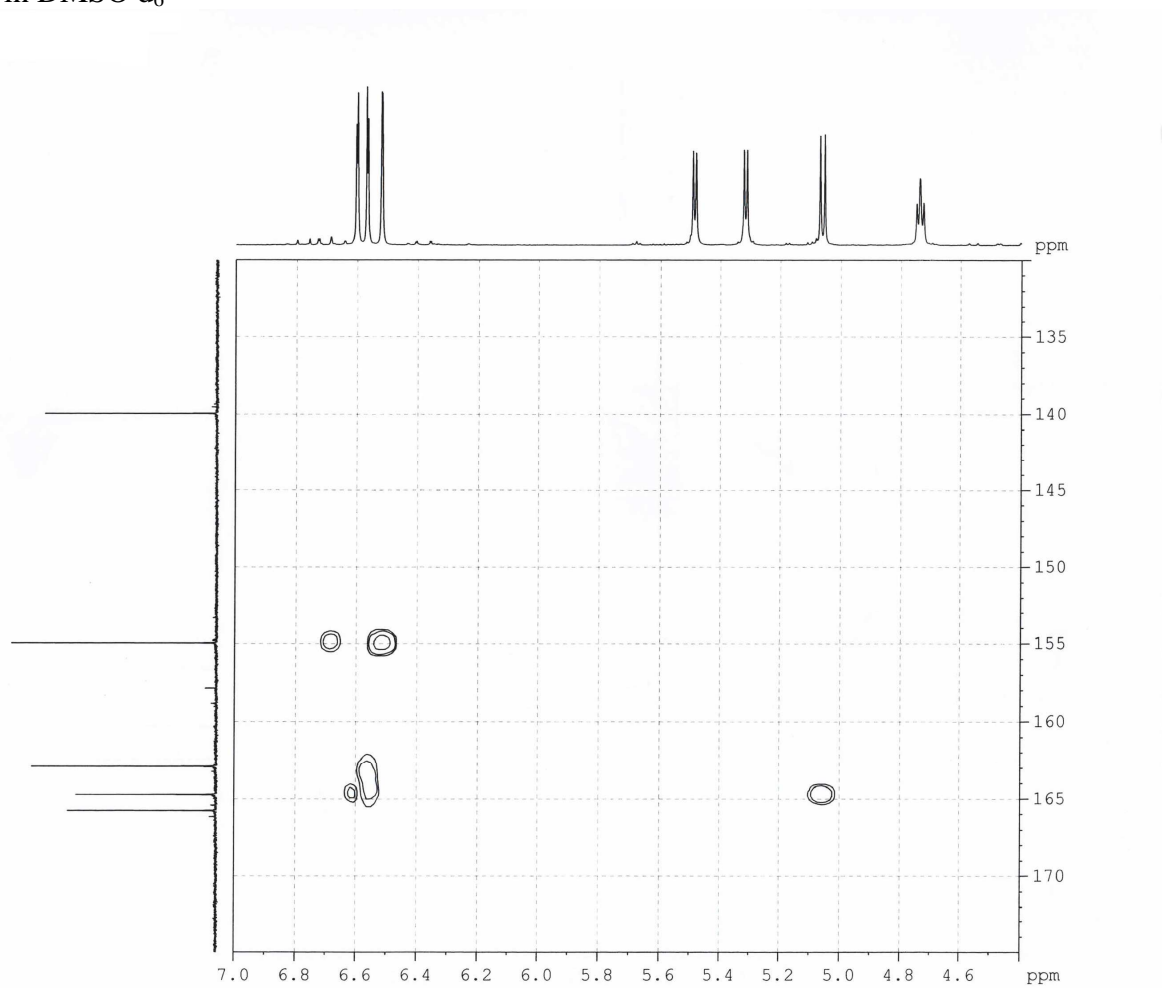

S11 NOESY of Compound **1** in DMSO d<sub>6</sub>

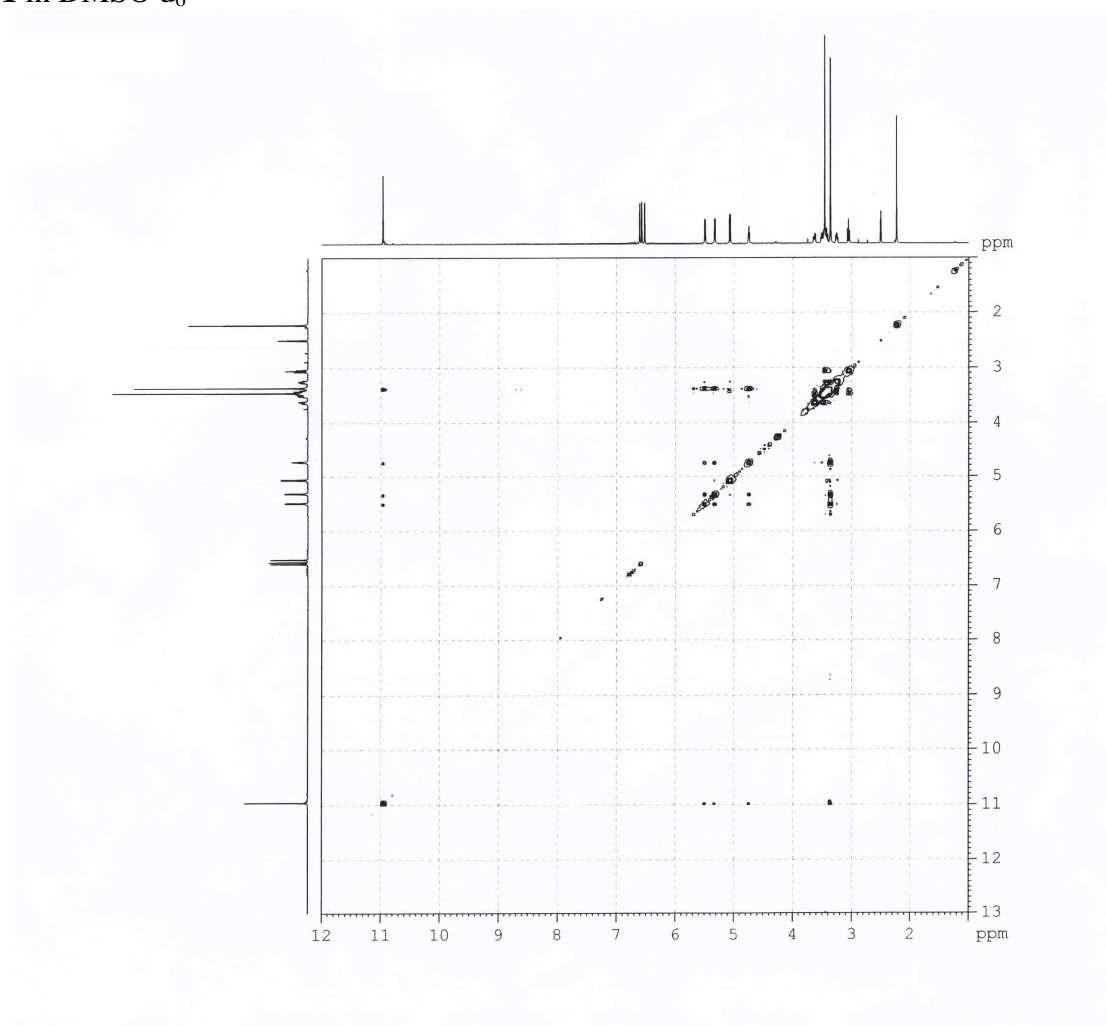

S12 NOESY of Compound **1** in DMSO d<sub>6</sub>

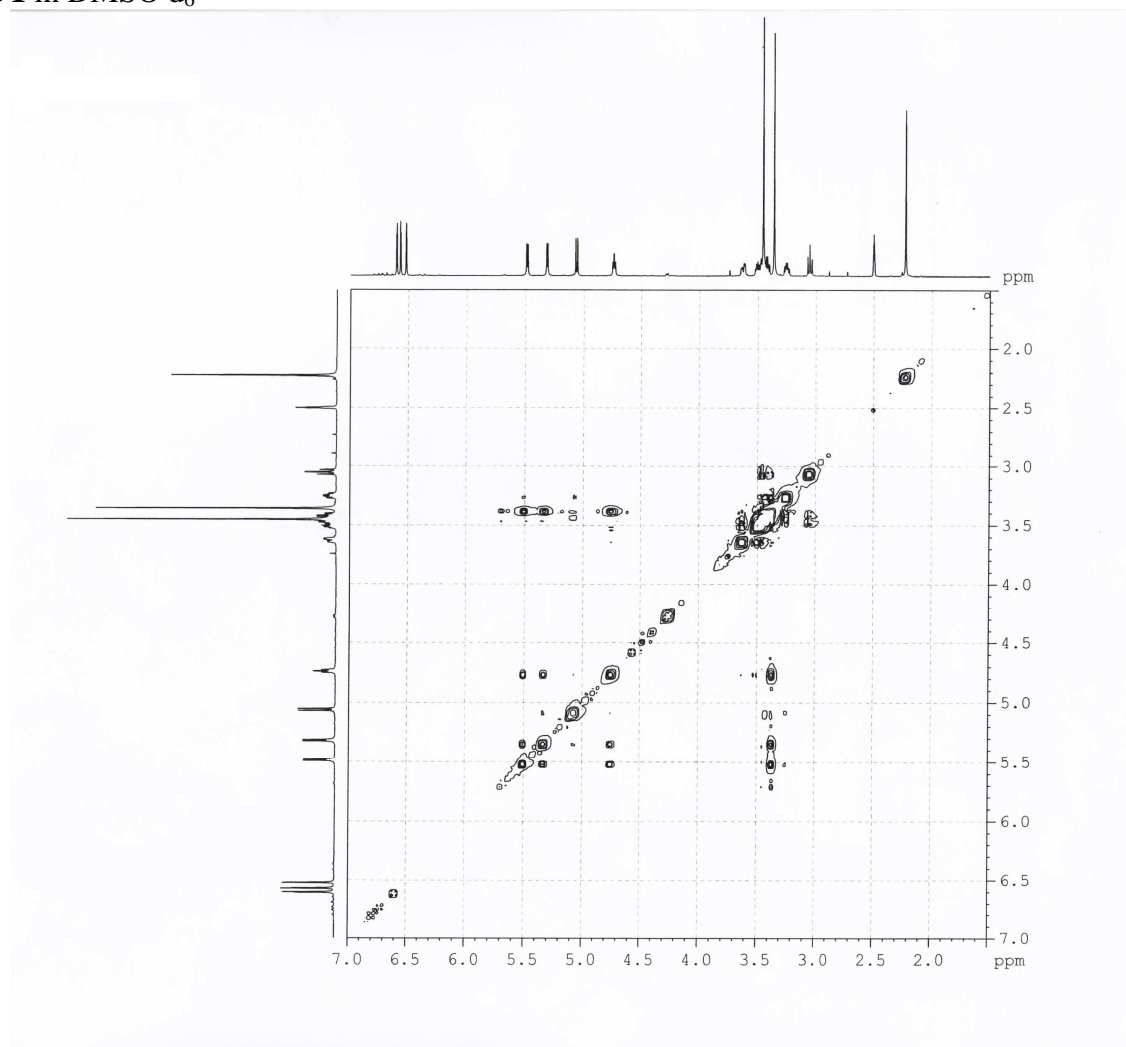

S13  $^1\text{H}$  NMR of Compound **3** in DMSO  $\text{d}_6$

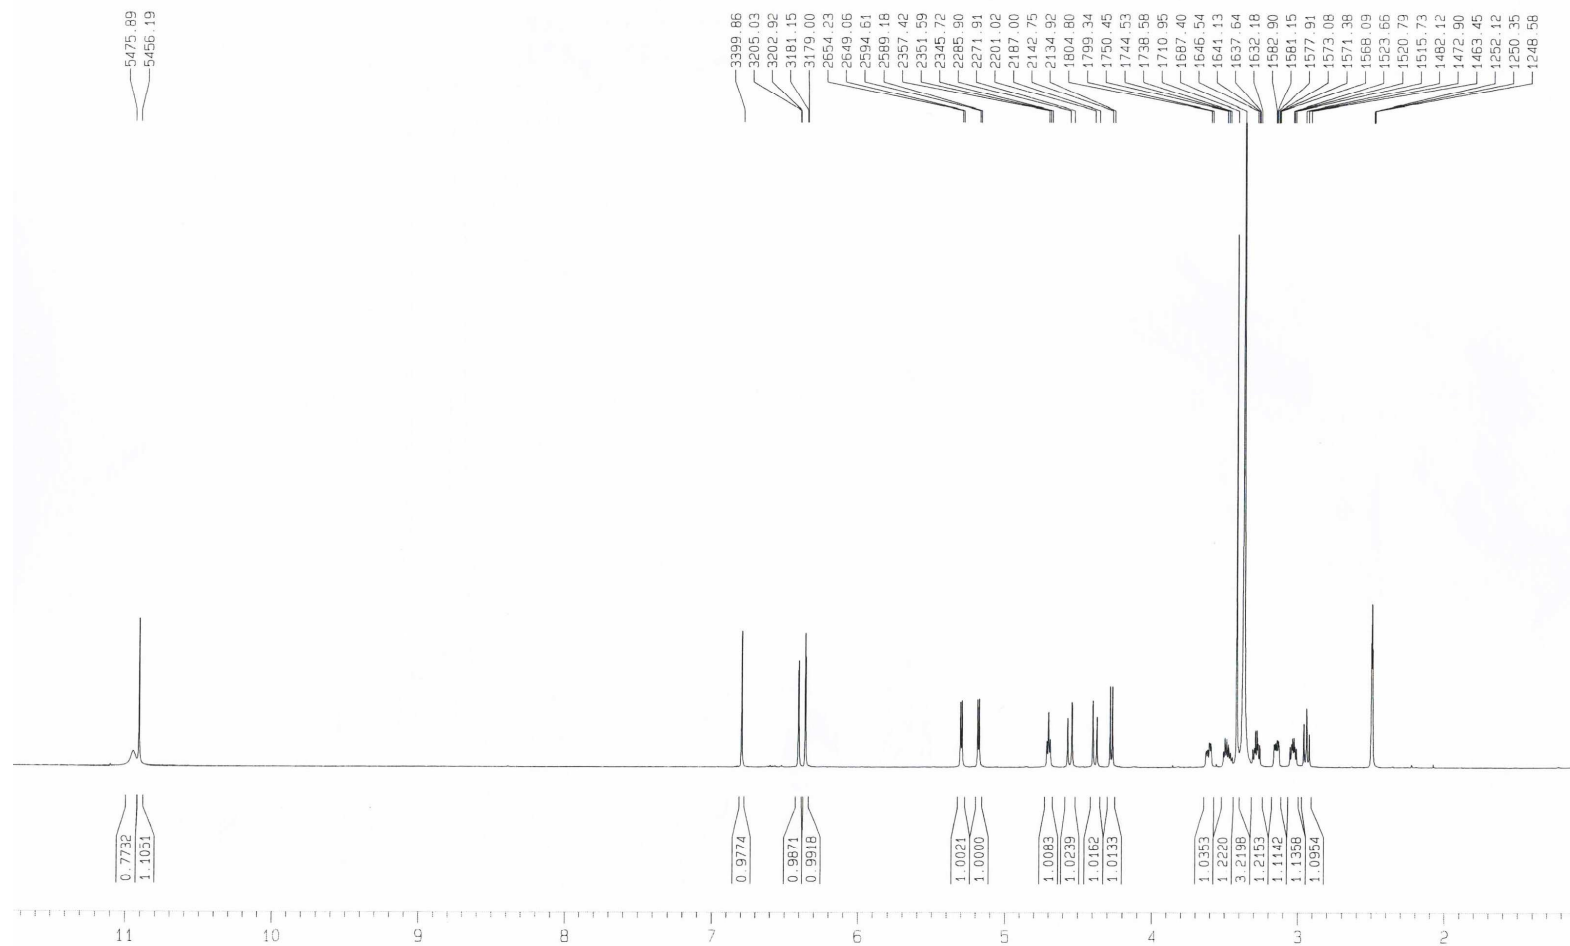



S14  $^1\text{H}$  NMR of Compound **3** in DMSO  $d_6$

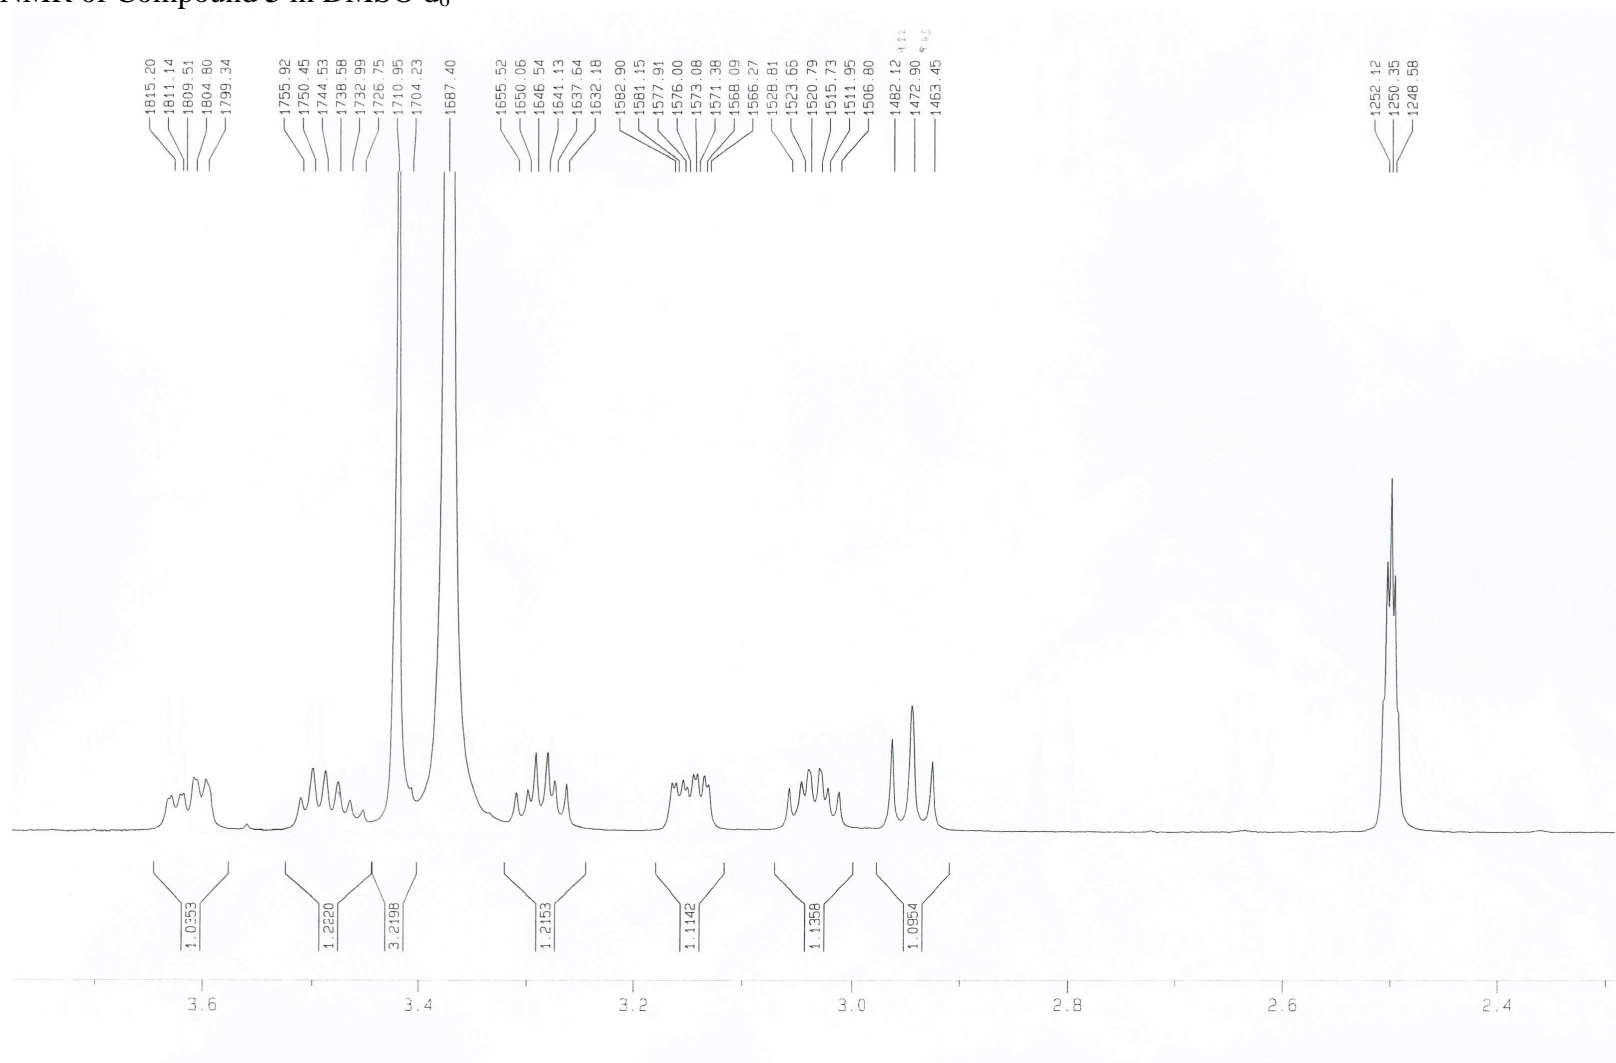

S15  $^1\text{H}$  NMR of Compound **3** in DMSO  $\text{d}_6$

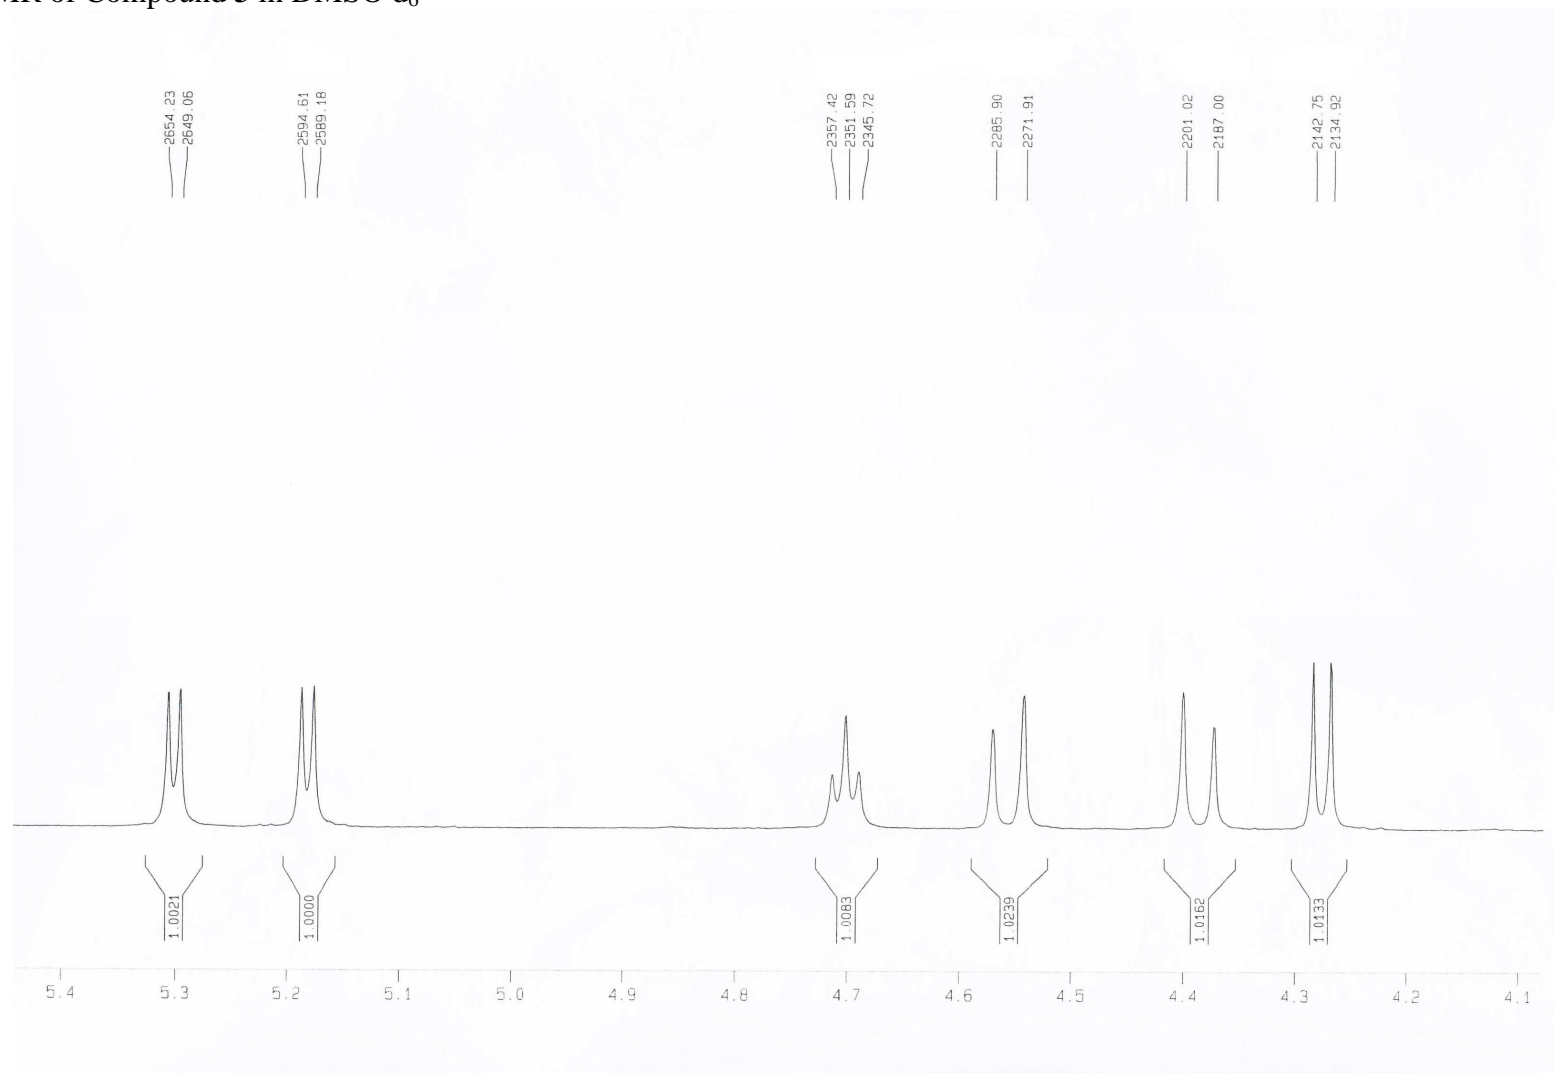

S16  $^{13}\text{C}$  NMR of Compound **3** in DMSO  $\text{d}_6$

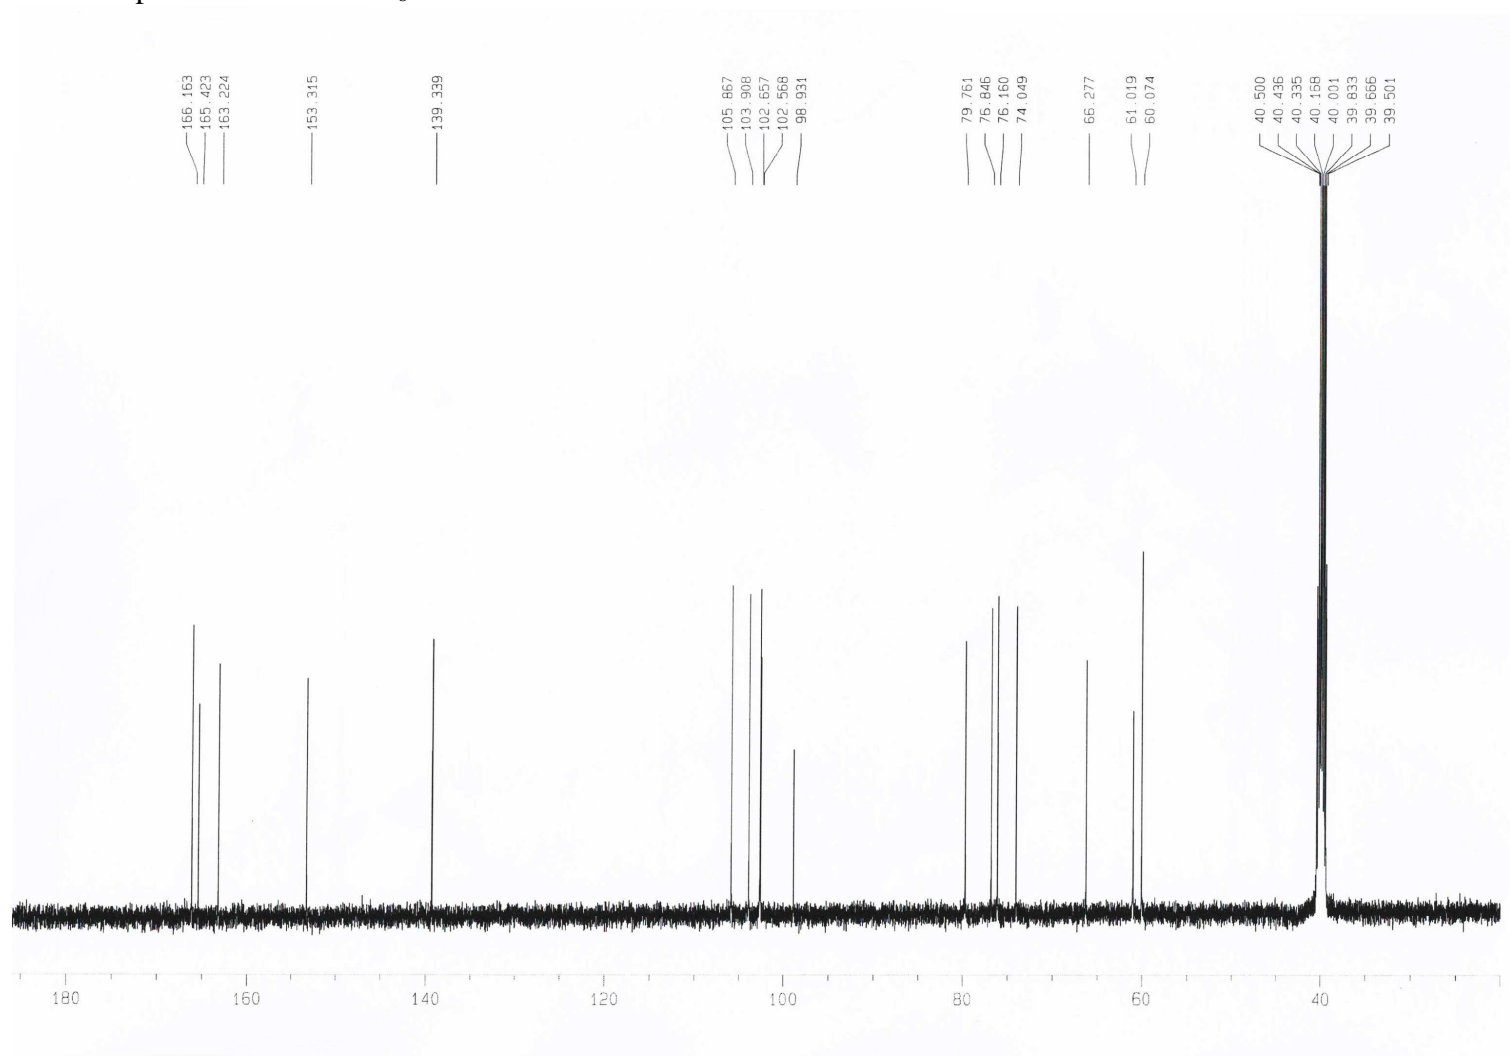

S17  $^{13}\text{C}$  NMR and DEPT-135 of Compound **3** in DMSO  $\text{d}_6$

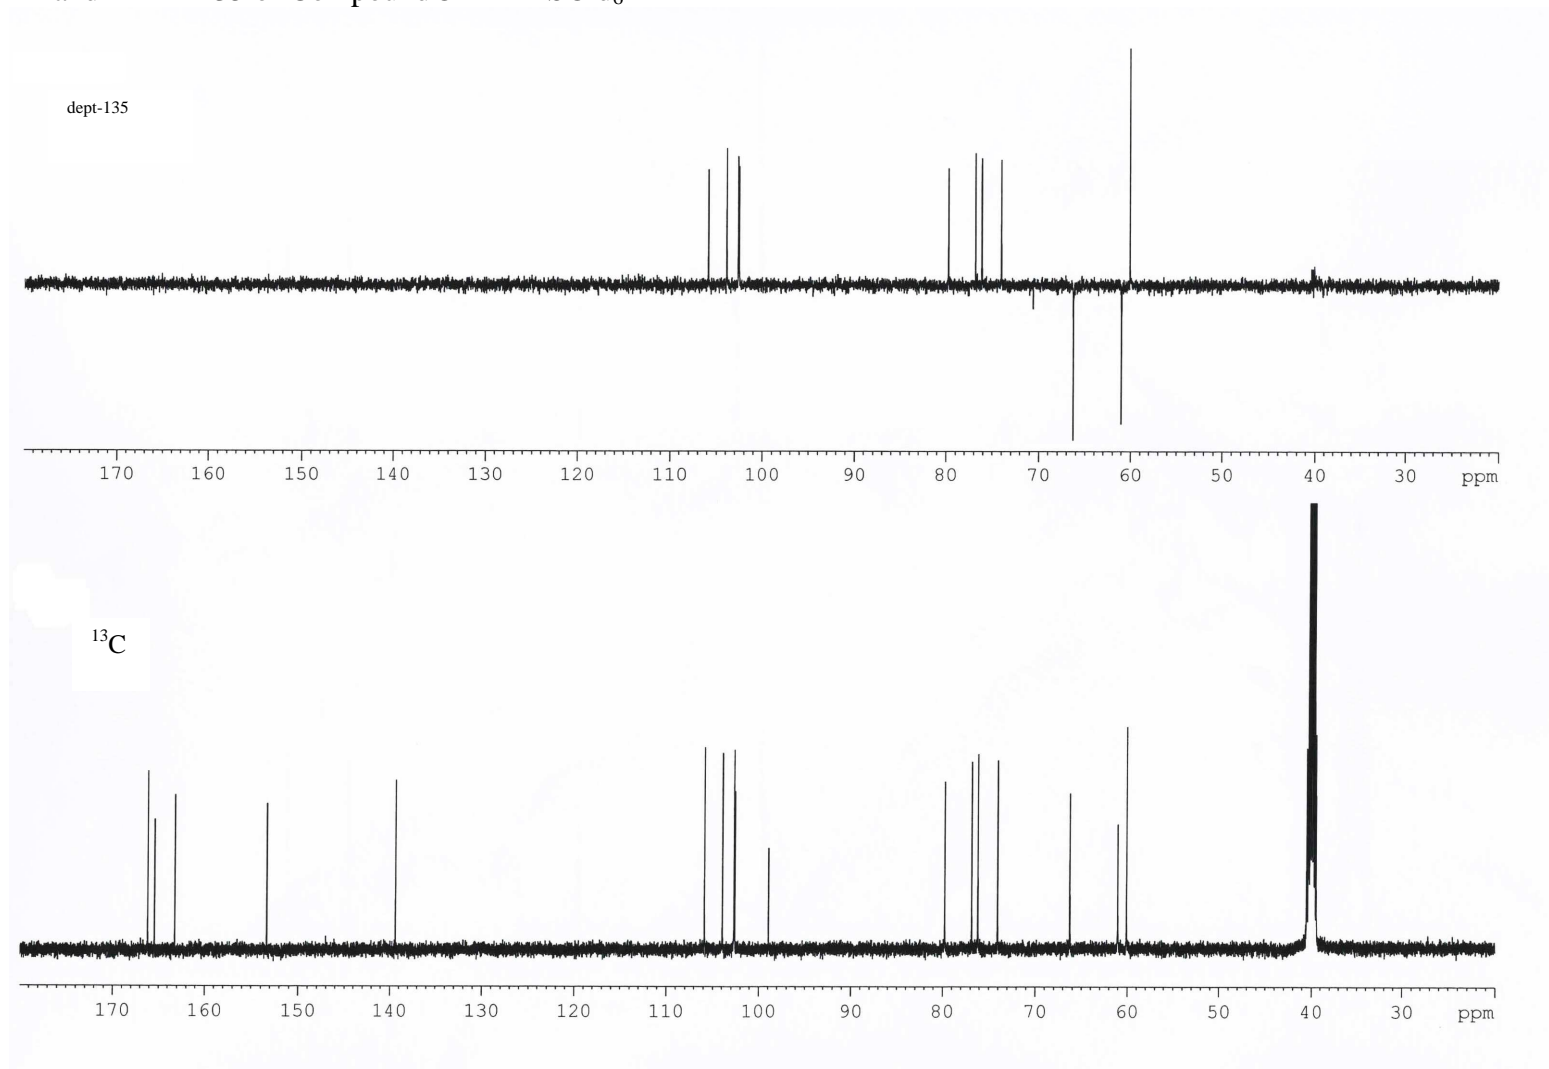

S18 HMQC of Compound **3** in DMSO d<sub>6</sub>

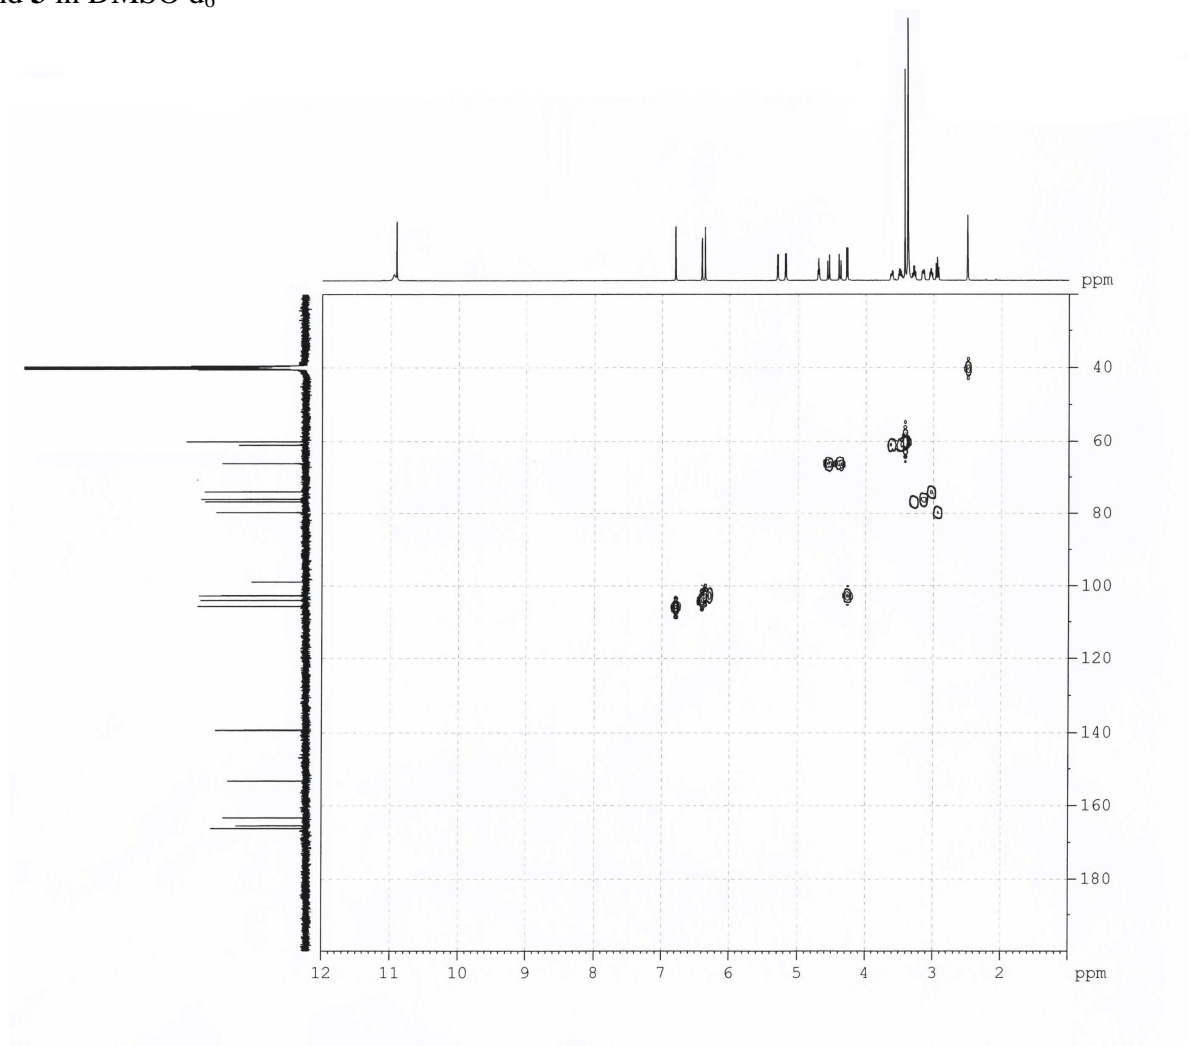

S19 HMBC of Compound **3** in DMSO d<sub>6</sub>

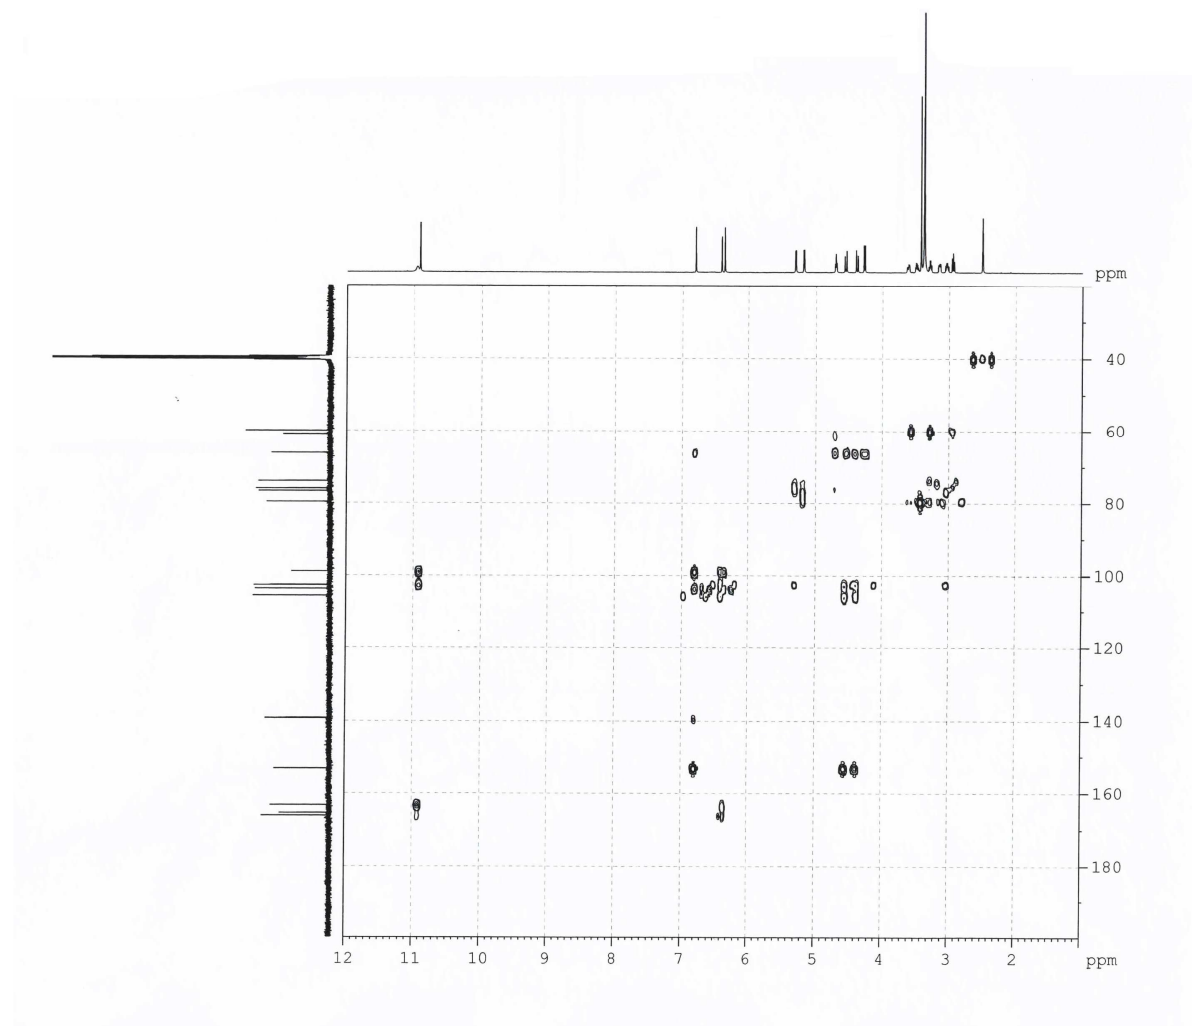

S20 HMBC of Compound **3** in DMSO d<sub>6</sub>

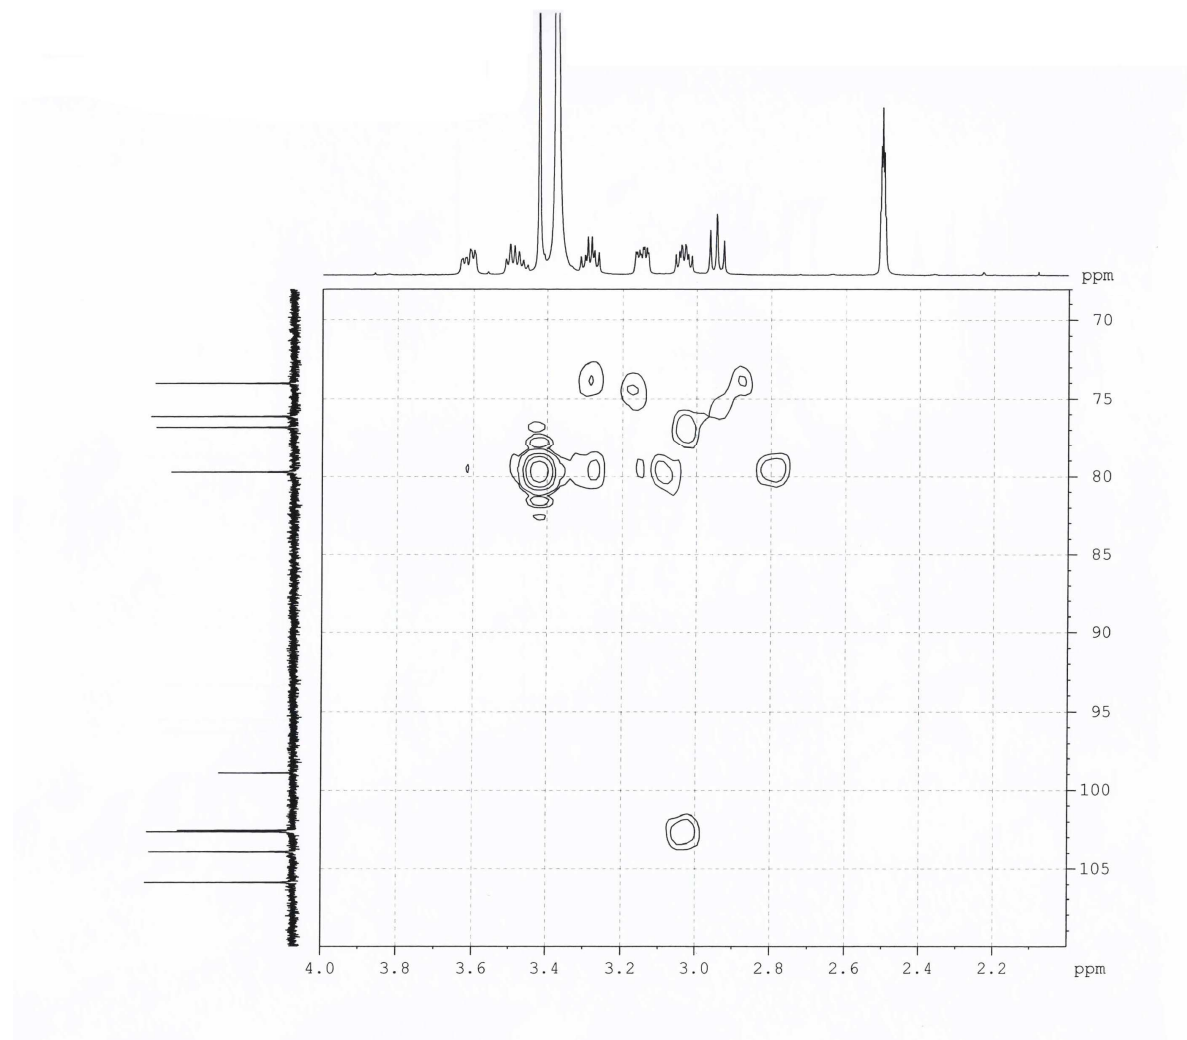

S21 HMBC of Compound **3** in DMSO  $d_6$

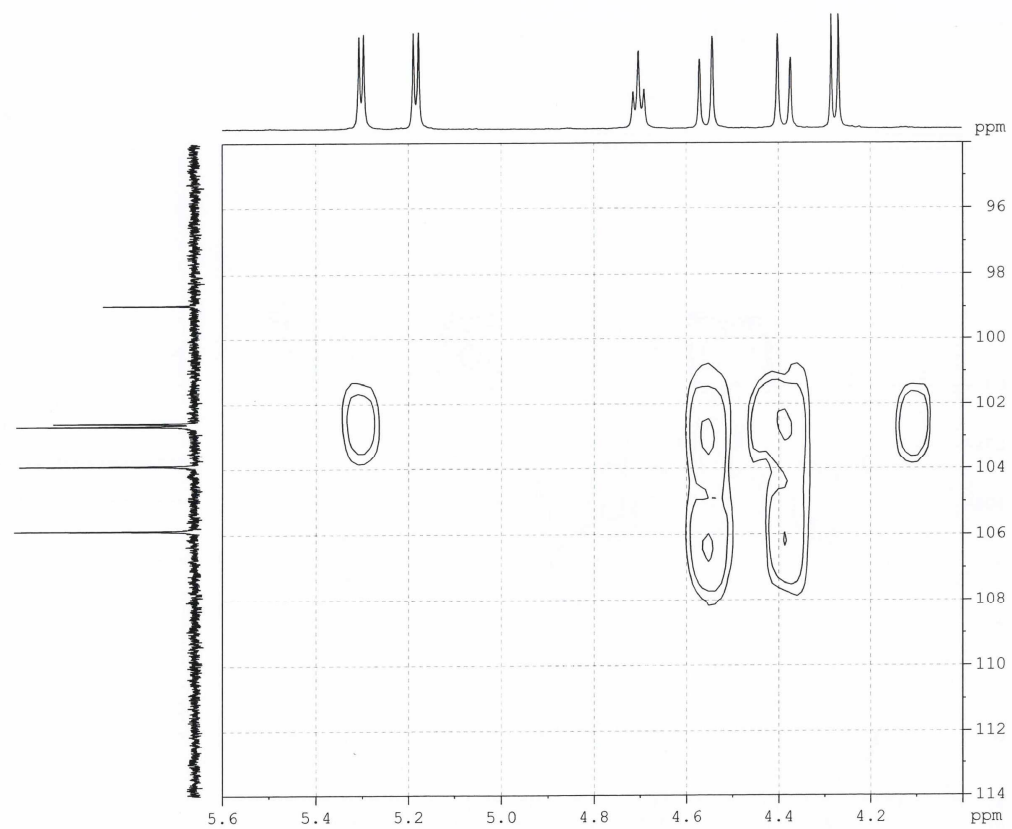



S22 HMBC of Compound **3** in DMSO  $d_6$

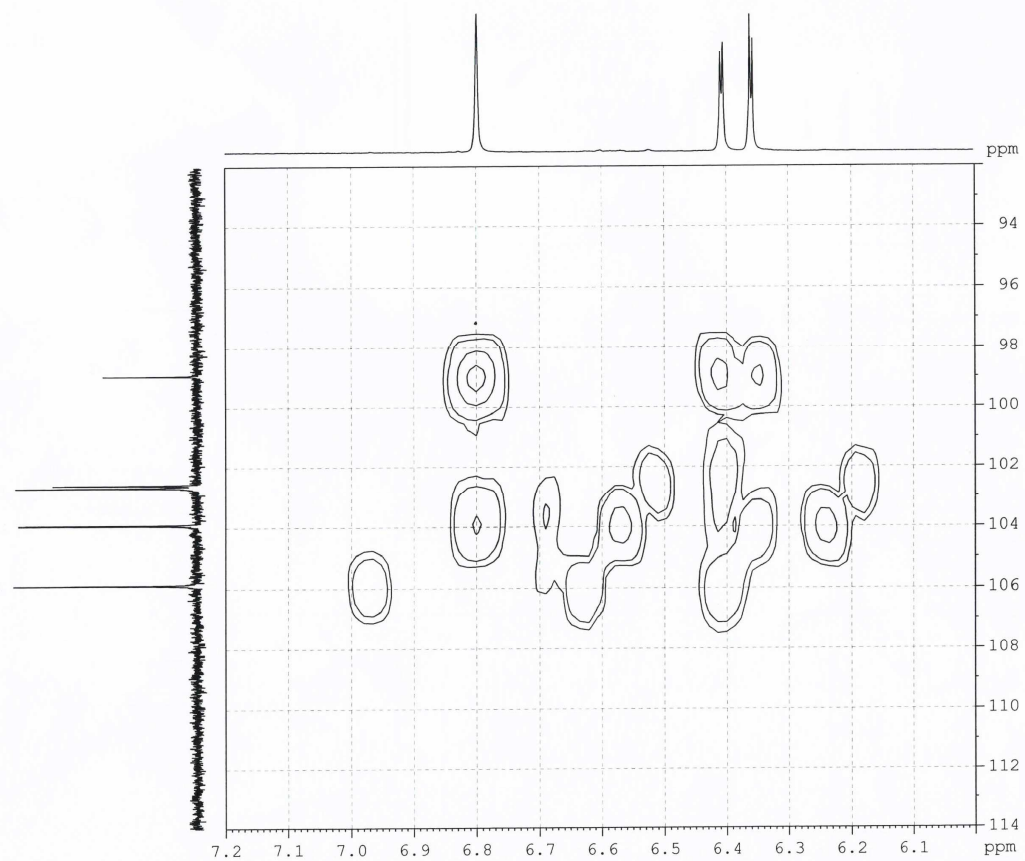

S23 NOESY of Compound **3** in DMSO  $d_6$

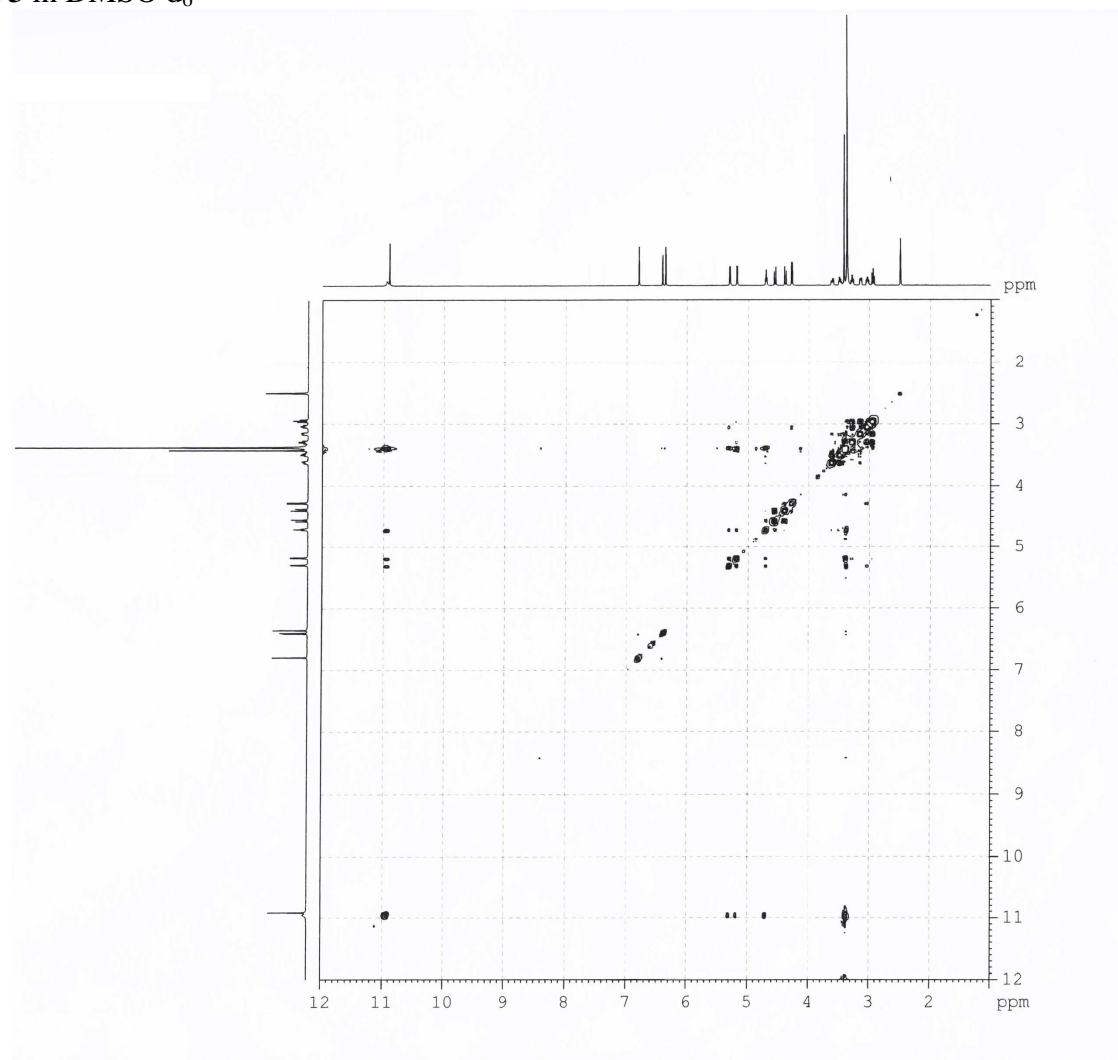

S24 NOESY of Compound **3** in DMSO  $d_6$

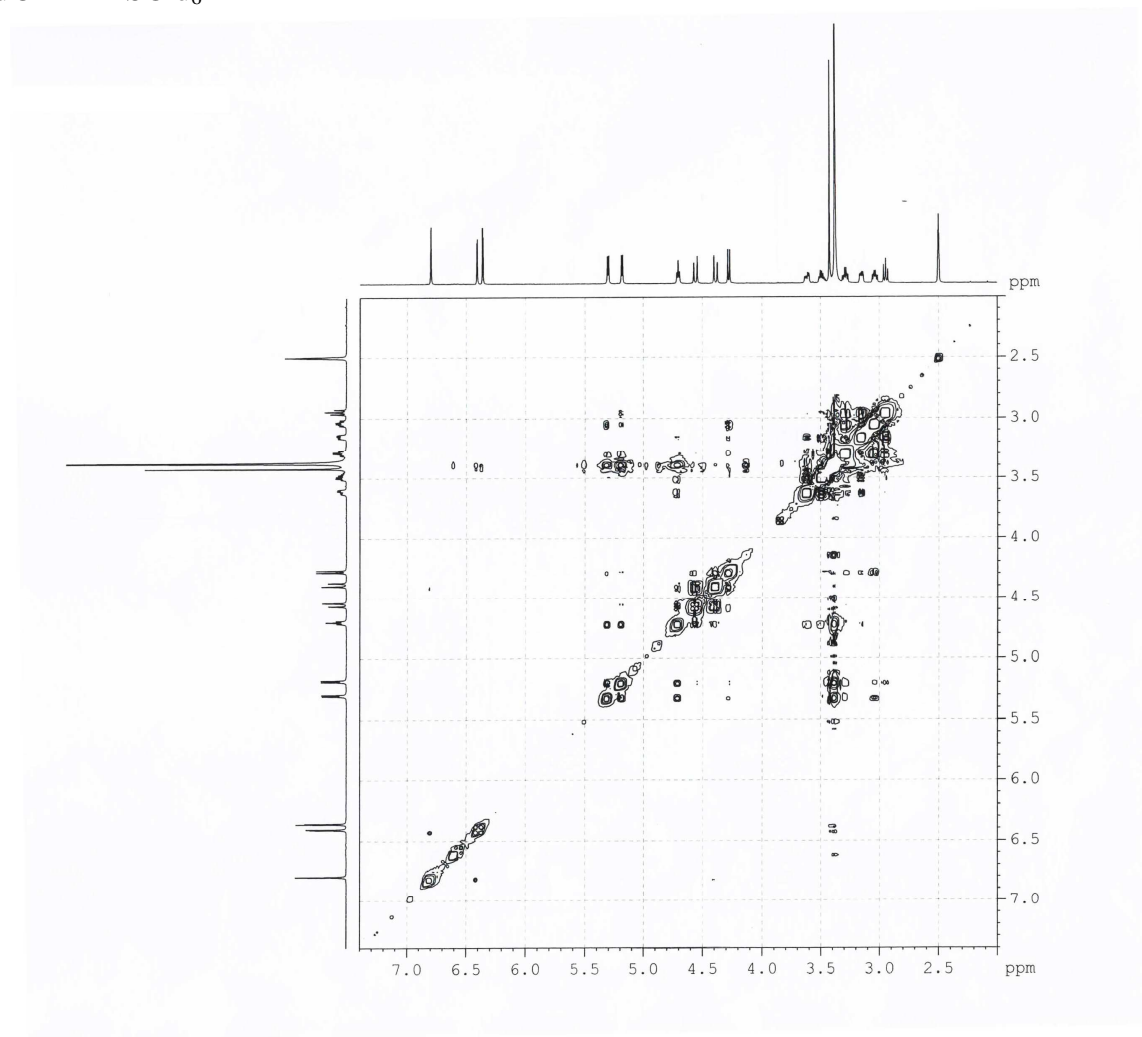

S25  $^1\text{H}$  NMR of Compound **4** in DMSO  $\text{d}_6$

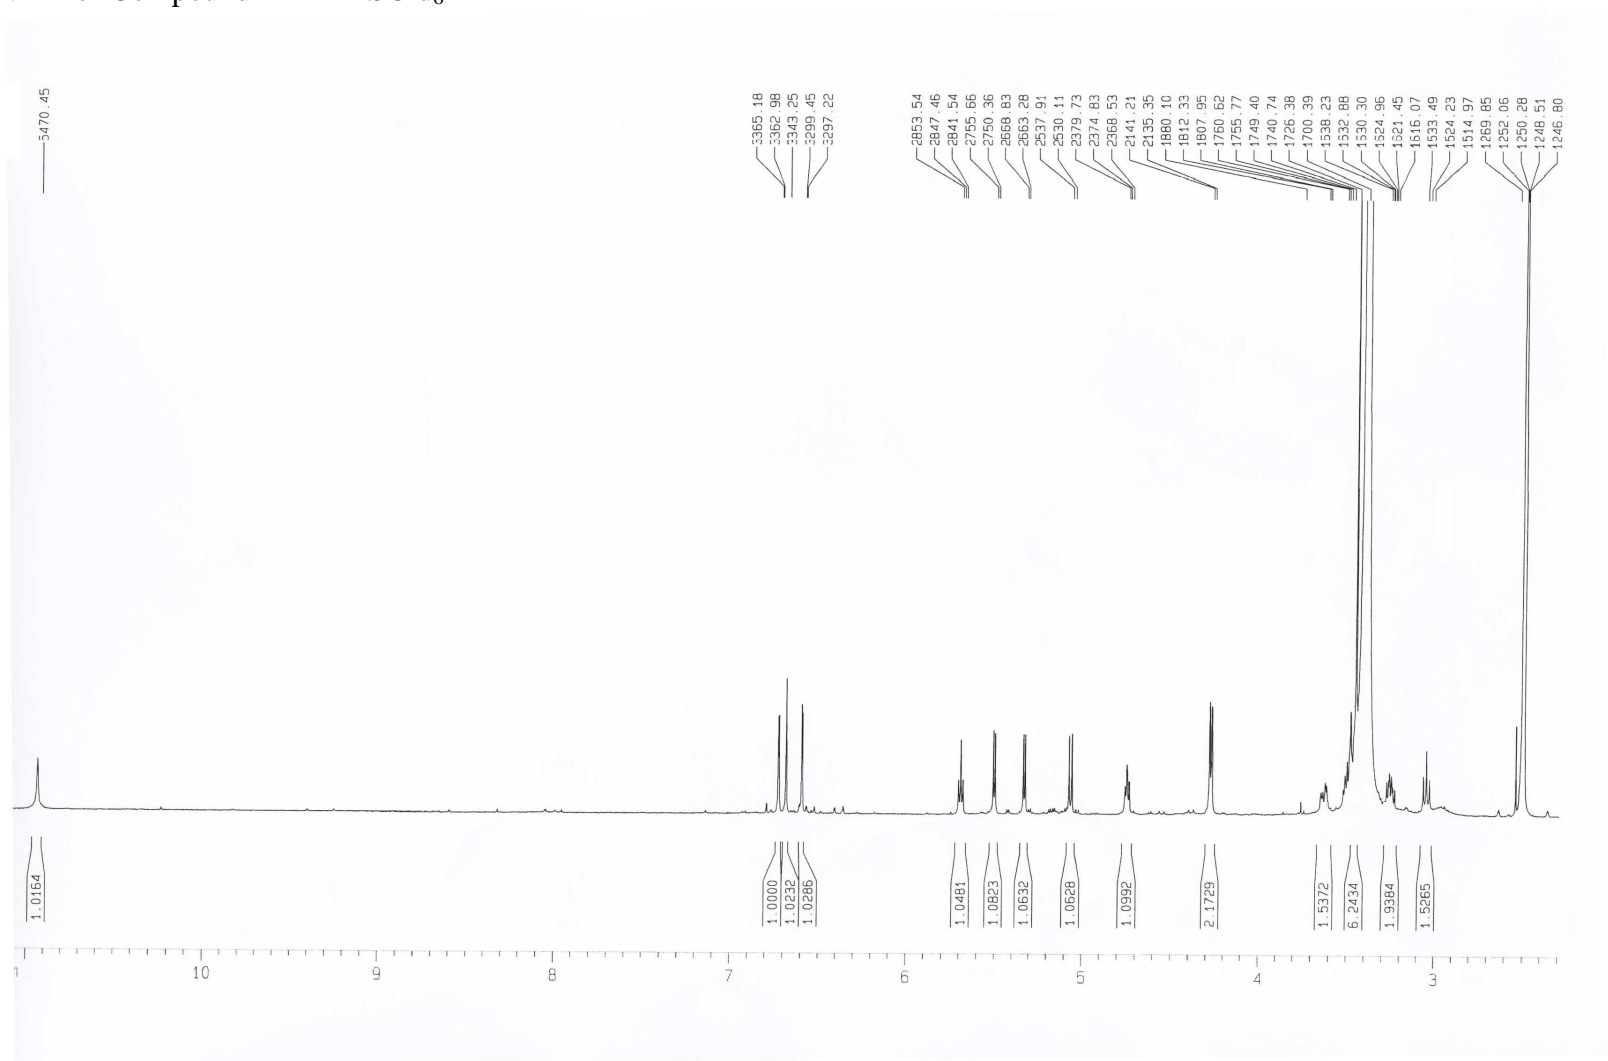

S26  $^1\text{H}$  NMR of Compound **4** in DMSO  $\text{d}_6$

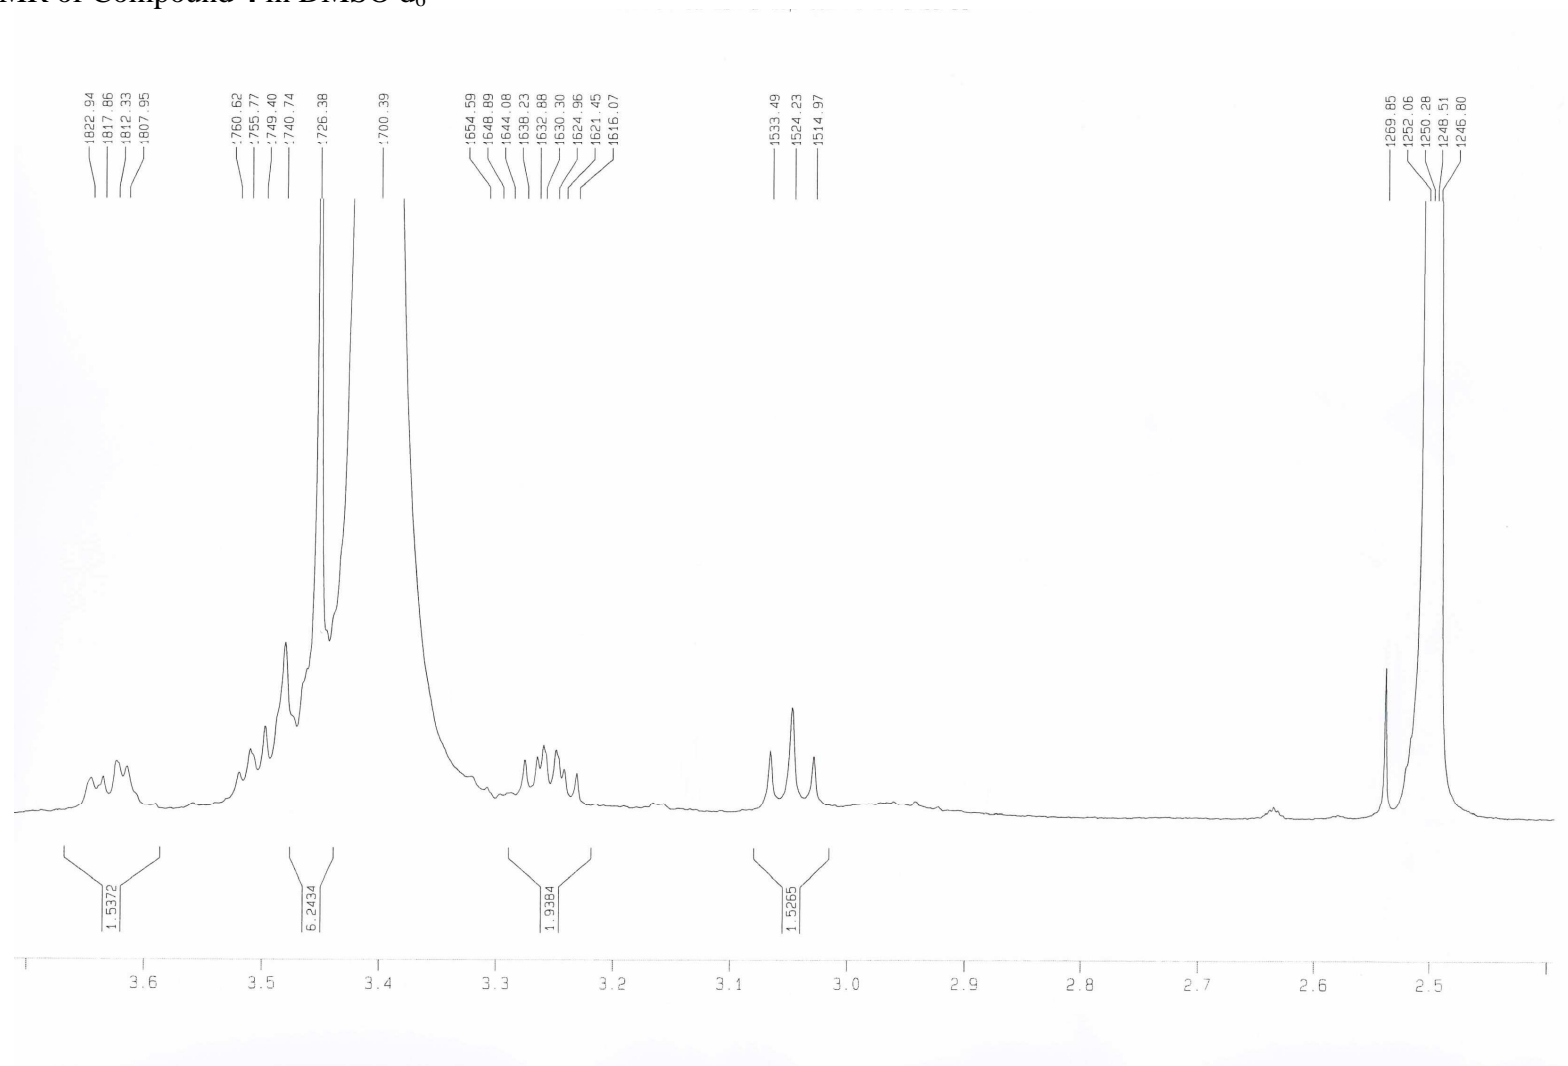

S27  $^{13}\text{C}$  NMR of Compound **4** in DMSO  $\text{d}_6$

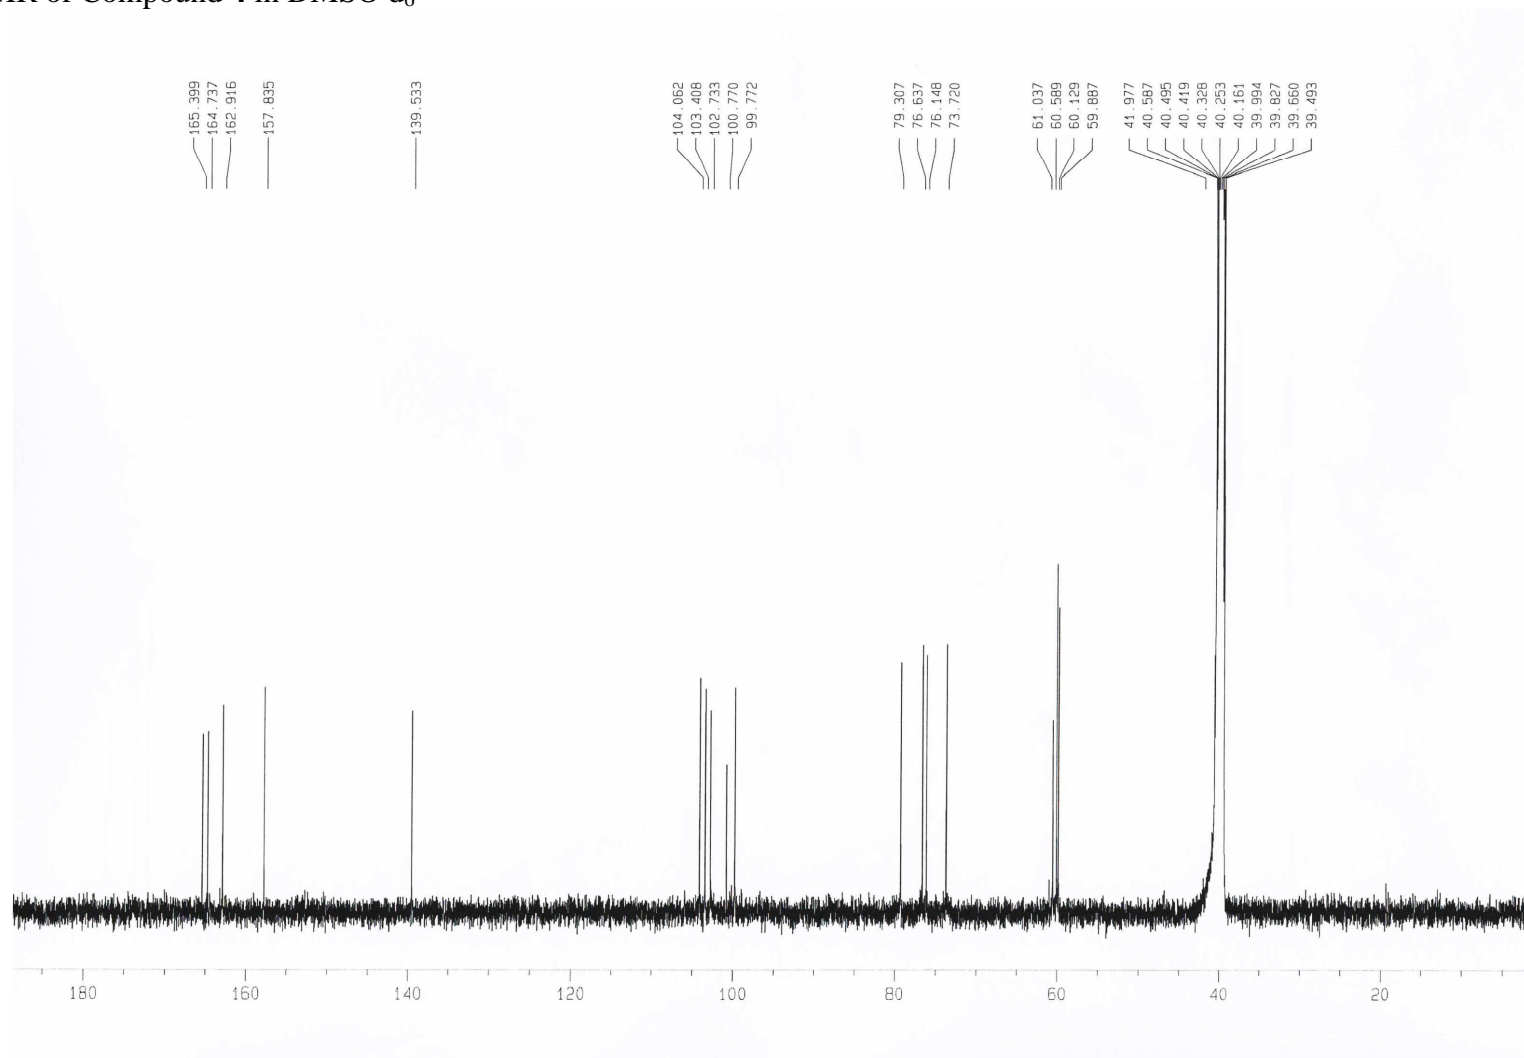

S28  $^{13}\text{C}$  NMR and DEPT-135 of Compound **4** in DMSO  $\text{d}_6$

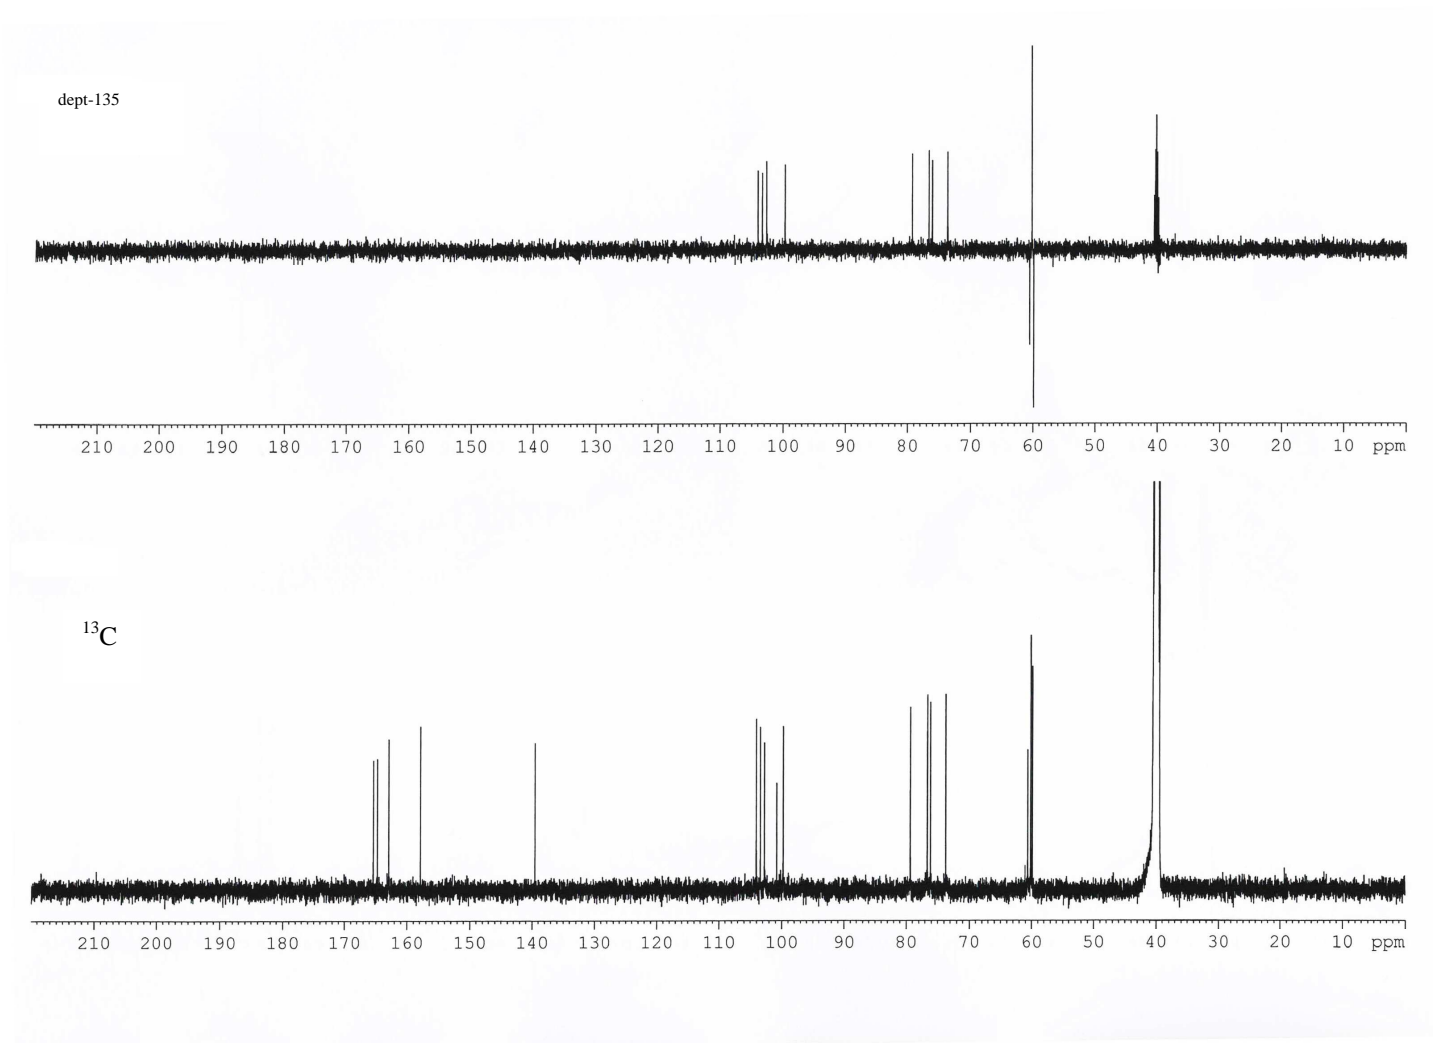

S29 HMQC of Compound **4** in DMSO d<sub>6</sub>

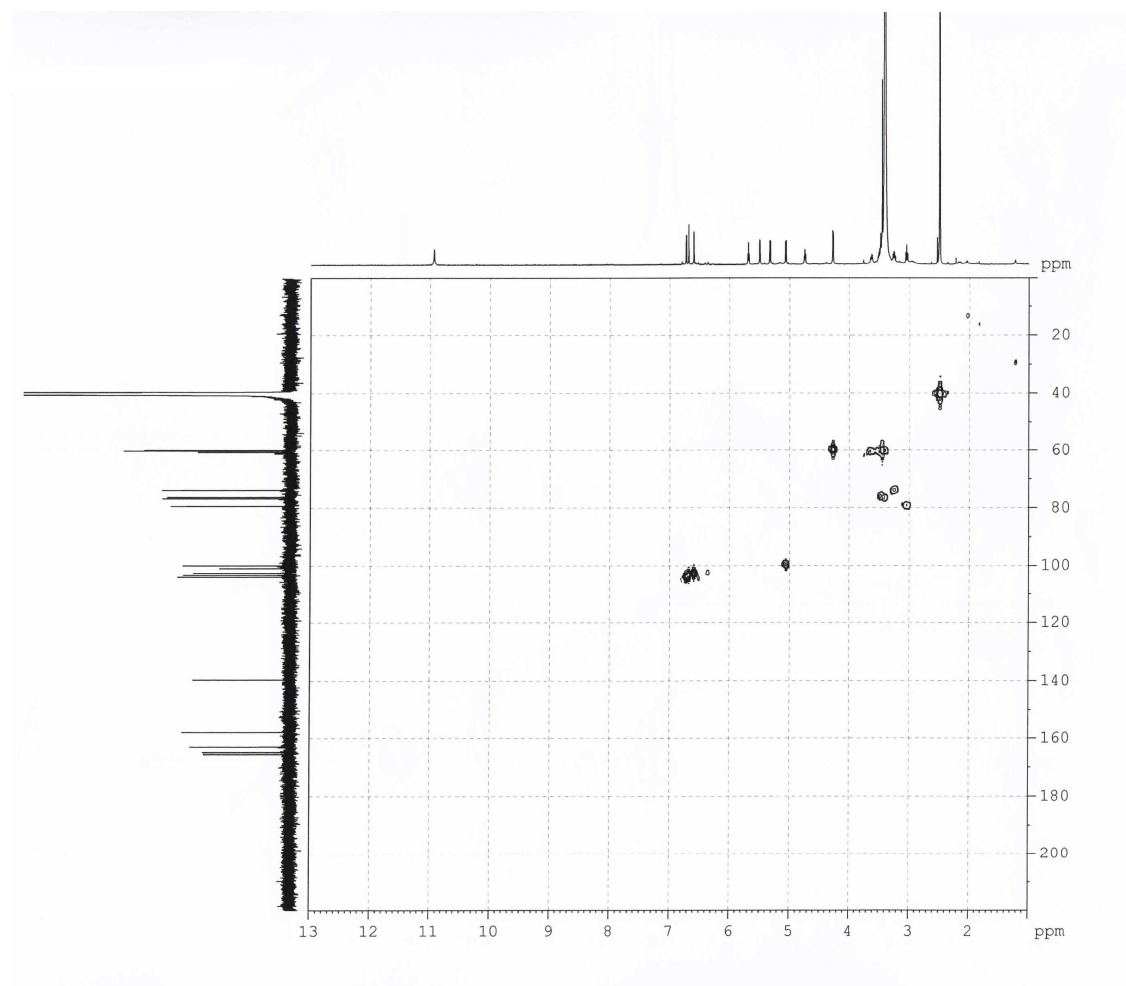



S30 HMBC of Compound **4** in DMSO  $d_6$

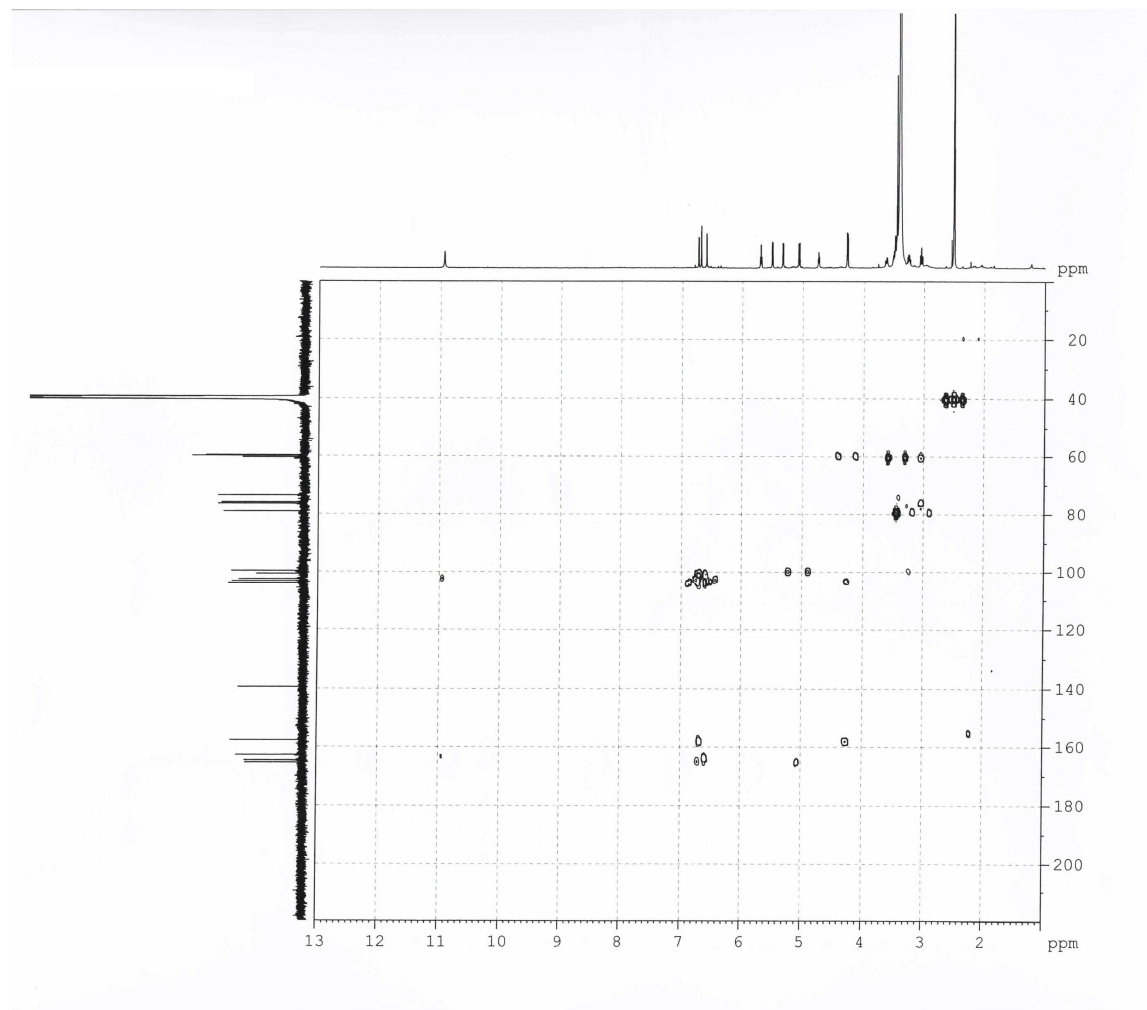

S31 HMBC of Compound **4** in DMSO d<sub>6</sub>

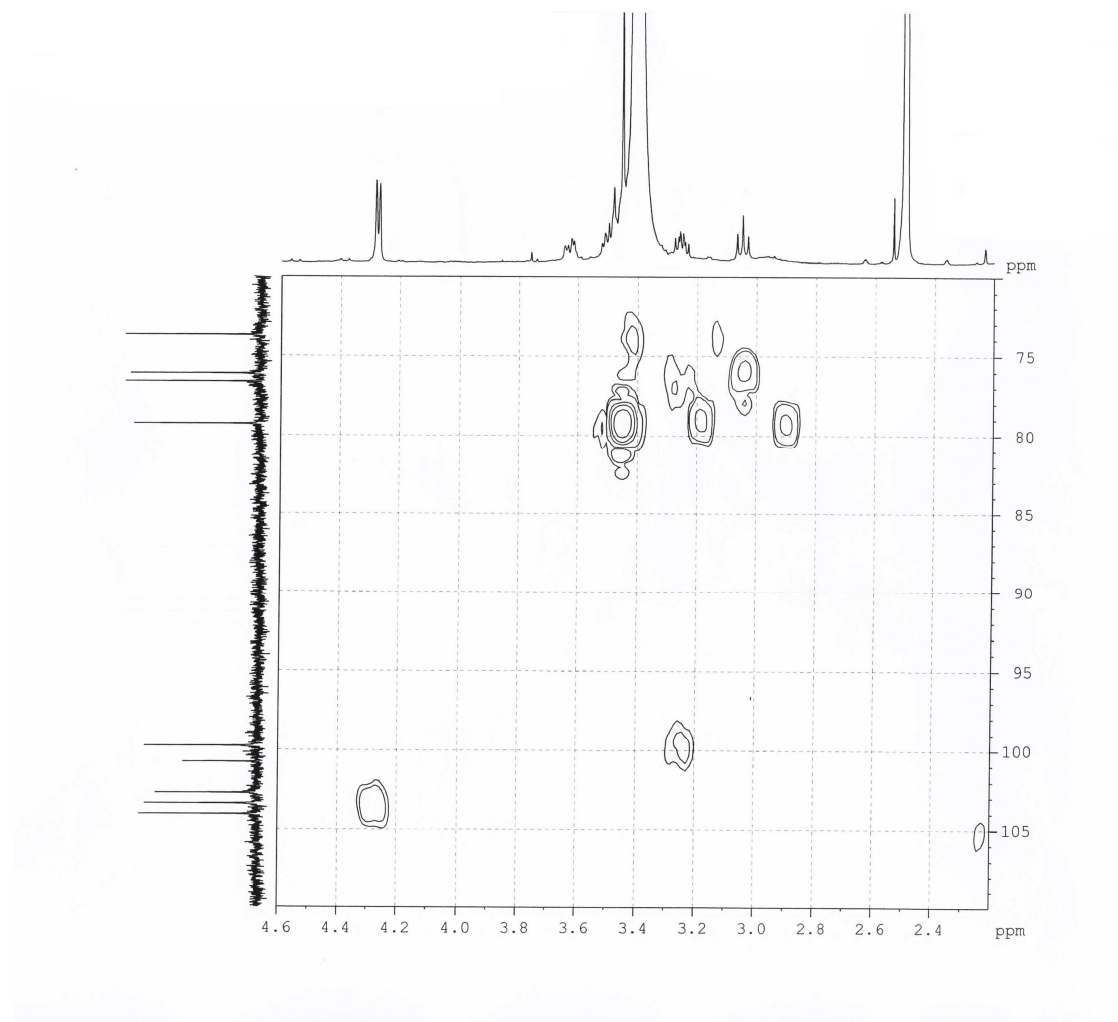

S32 HMBC of Compound **4** in DMSO  $d_6$

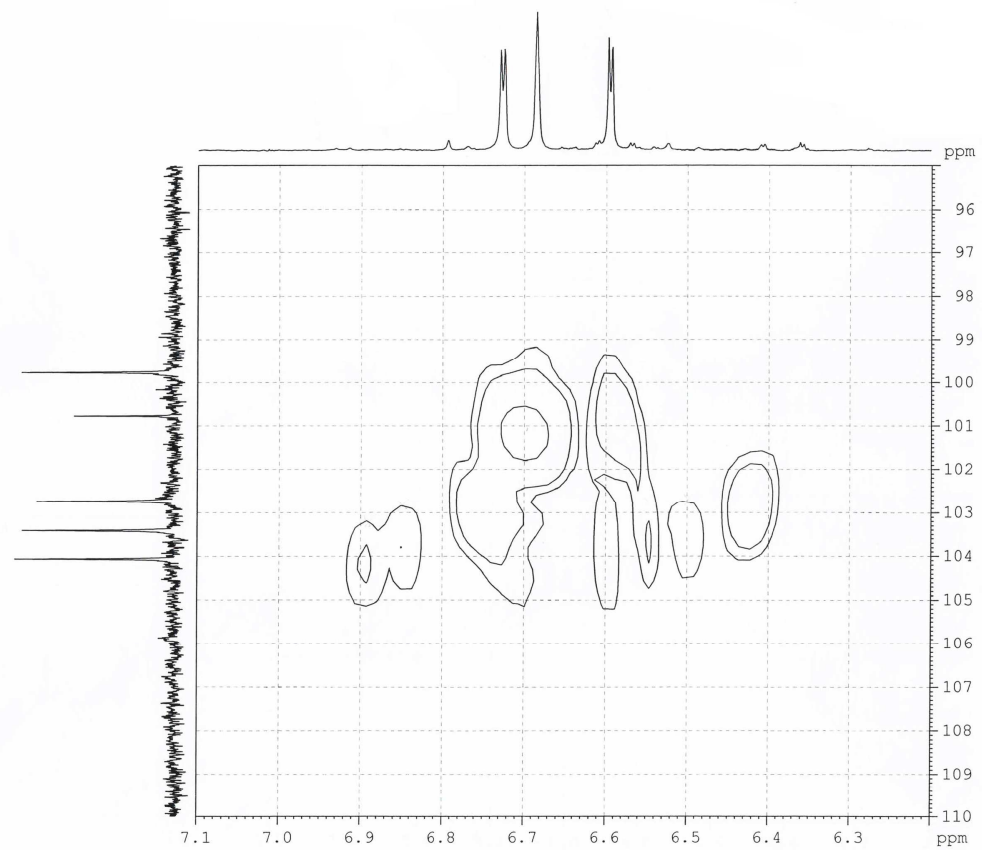

S33 NOESY of Compound **4** in DMSO d<sub>6</sub>

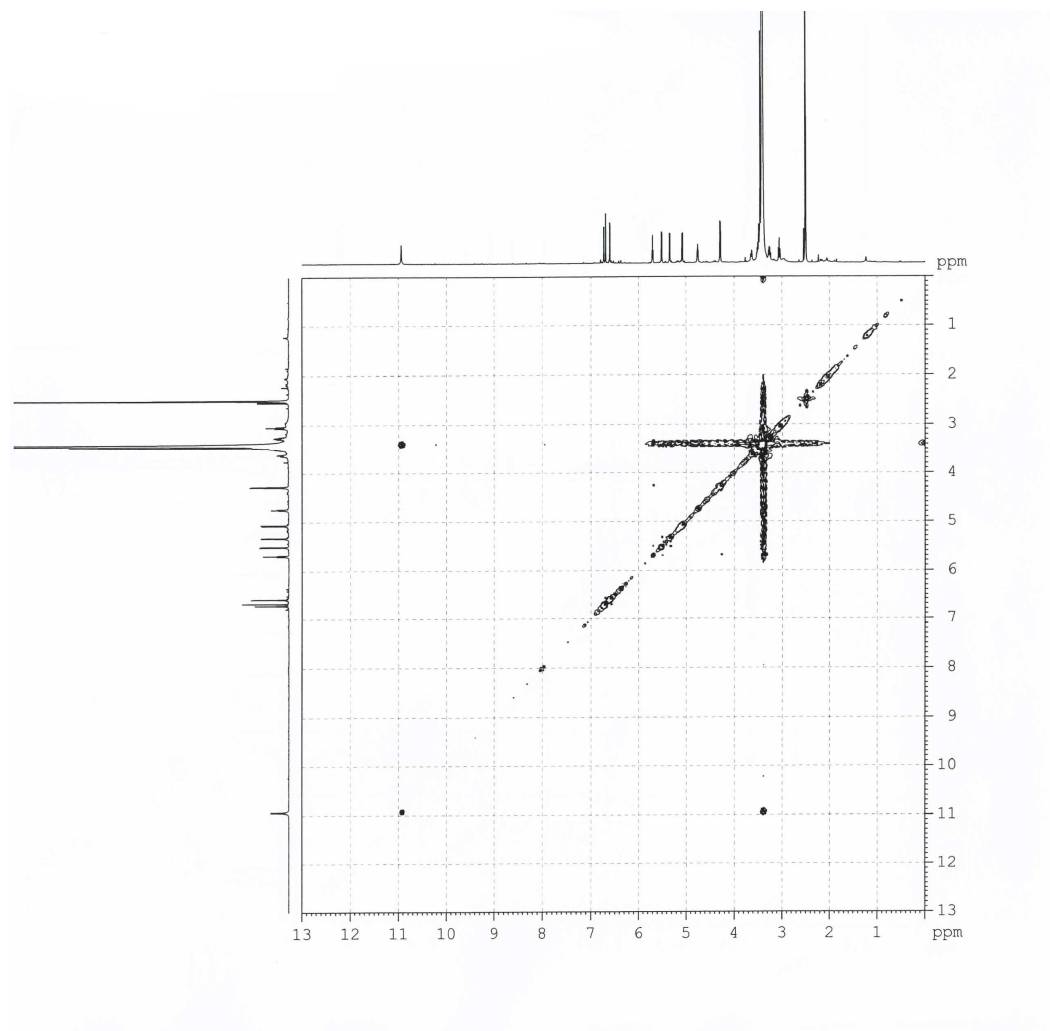

S34 NOESY of Compound **4** in DMSO d<sub>6</sub>

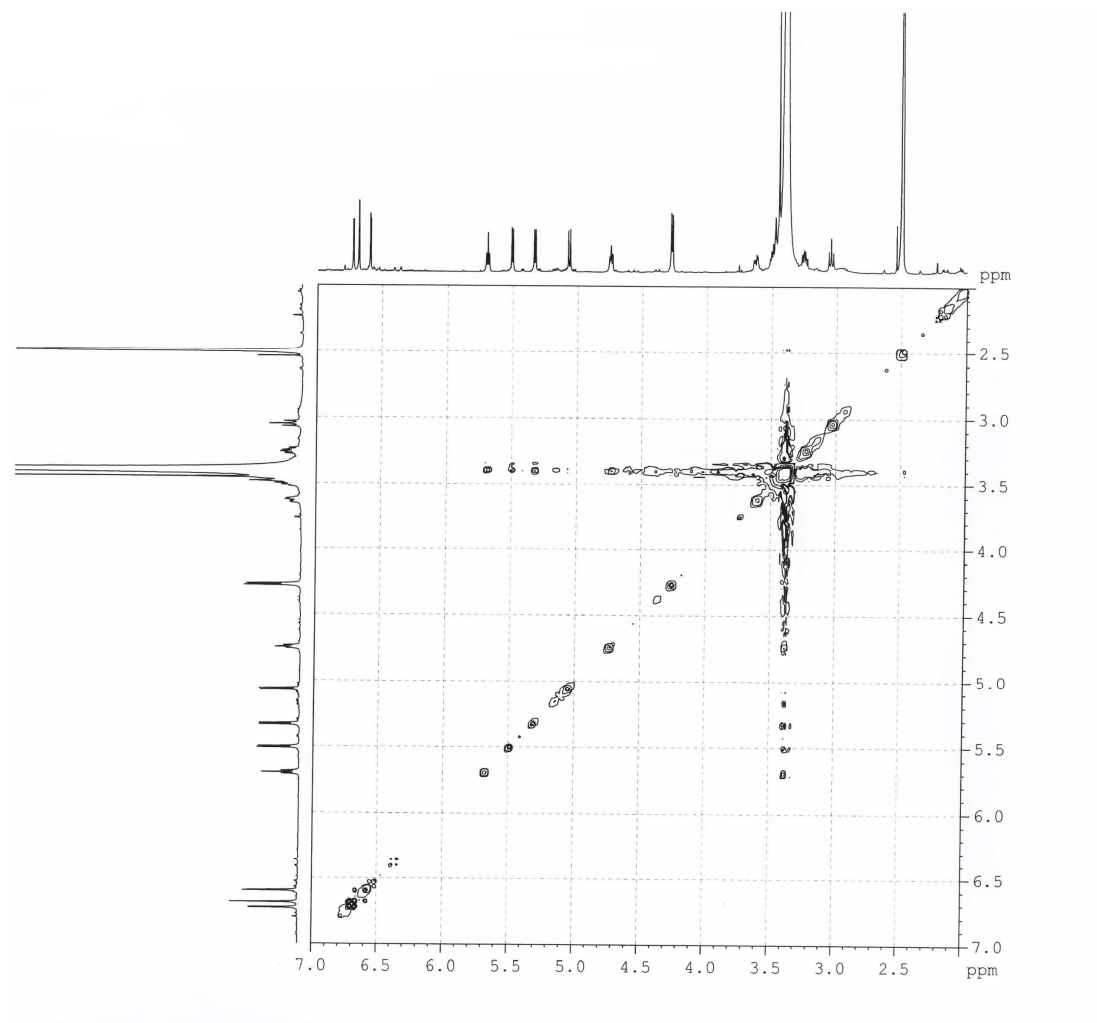

Supplement: Supplementary file 1 [file 4539058]
